# Supplementary material for: Dehydrogenative alcohol coupling and one-pot cross metathesis/dehydrogenative coupling reactions of alcohols using Hoveyda–Grubbs catalysts
Source: Royal Society of Chemistry journal article supplement (doi:10.1039/d1nj00255d), 2021-01-01
Supplement: d1nj00255d1.pdf [file d1nj00255d1.pdf]

## SUPPORTING INFORMATION

### **Dehydrogenative alcohol coupling and one-pot cross metathesis/dehydrogenative coupling reactions of alcohols using Grubbs catalysts**

Halenur ÖZER,<sup>a</sup> Dilan ARSLAN<sup>a</sup> and Bengi Özgün ÖZTÜRK<sup>\*,a</sup>

<sup>a</sup>Hacettepe University, Faculty of Science, Chemistry Department, 06800, Beytepe-Ankara, TURKEY

**Table S1.** The effect of KOH and PCy<sub>3</sub> on formation of benzoic acid/octanoic acid

| Entry     | KOH % | PCy <sub>3</sub> % | Substrate | Time (h) | Conv. %         | Yield % <sup>a</sup> |         |
|-----------|-------|--------------------|-----------|----------|-----------------|----------------------|---------|
|           |       |                    |           |          |                 | 3a/3b                | 4a/4b   |
| <b>1</b>  |       | -                  | 1a        | 48       | 65              | 55 (3a)              | -       |
| <b>2</b>  | 50    | -                  | 1b        | 48       | 99 <sup>b</sup> | 13 (3b)              | -       |
| <b>3</b>  |       | -                  | 1a        | 48       | 90              | -                    | 4 (4a)  |
| <b>4</b>  | 100   | -                  | 1b        | 48       | 80 <sup>b</sup> | -                    | 8 (4b)  |
| <b>5</b>  |       | 5                  | 1a        | 24       | 84              | 78 (3a)              | 6 (4a)  |
| <b>6</b>  |       | 15                 | 1a        | 24       | 98              | 82 (3a)              | 16 (4a) |
| <b>7</b>  | 50    | 20                 | 1a        | 24       | 65              | 44 (3a)              | 21 (4a) |
| <b>8</b>  |       | 20                 | 1b        | 24       | 80              | 60 (3b)              | 20 (4b) |
| <b>9</b>  |       | 10                 | 1a        | 12       | 90              | 70 (3a)              | 20 (4a) |
| <b>10</b> | 100   | 10                 | 1b        | 12       | 95              | 65 (3b)              | 30 (4b) |

a: Determined by GC-MS. b: benzaldehyde was formed as the major product.

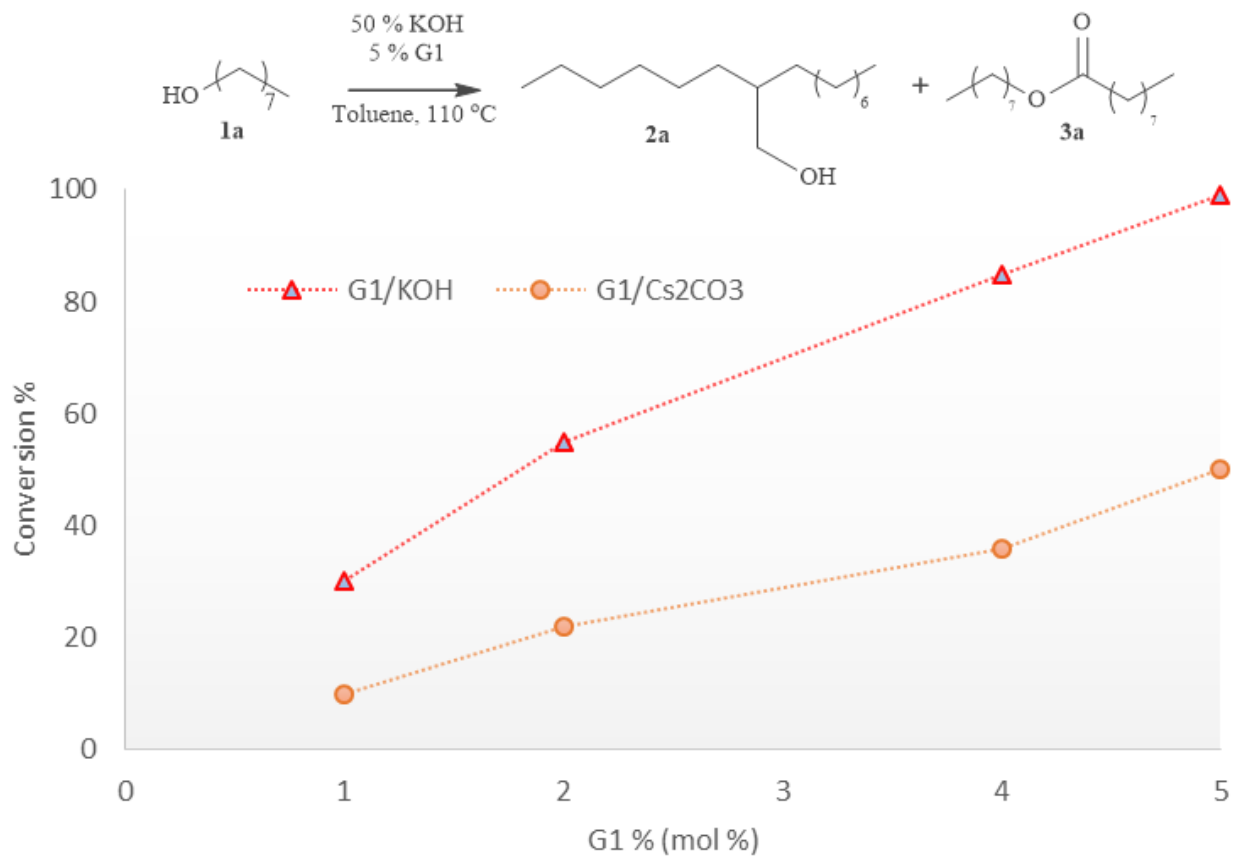

**Graph S1.** The effect of G1 % loading on conversion rate of dehydrogenative alcohol coupling of 1-octanol

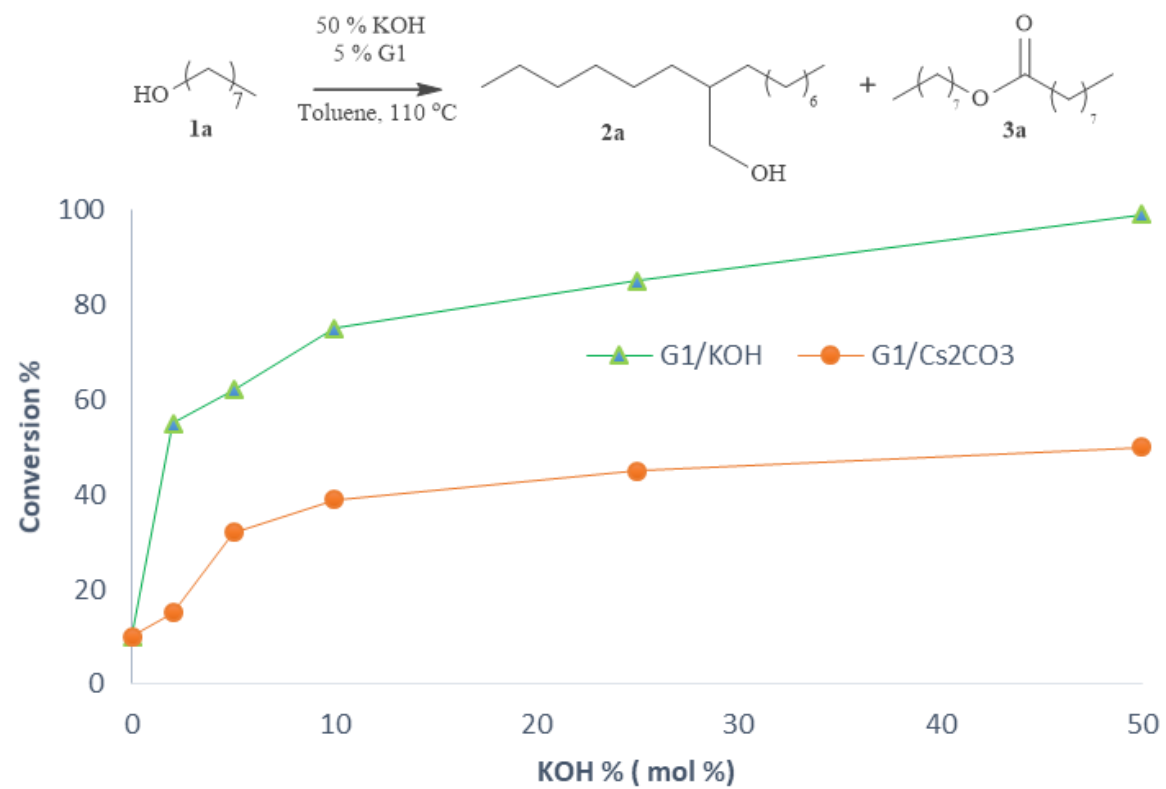

**Graph S2.** The effect of KOH % loading on conversion rate of dehydrogenative alcohol coupling of 1-octanol

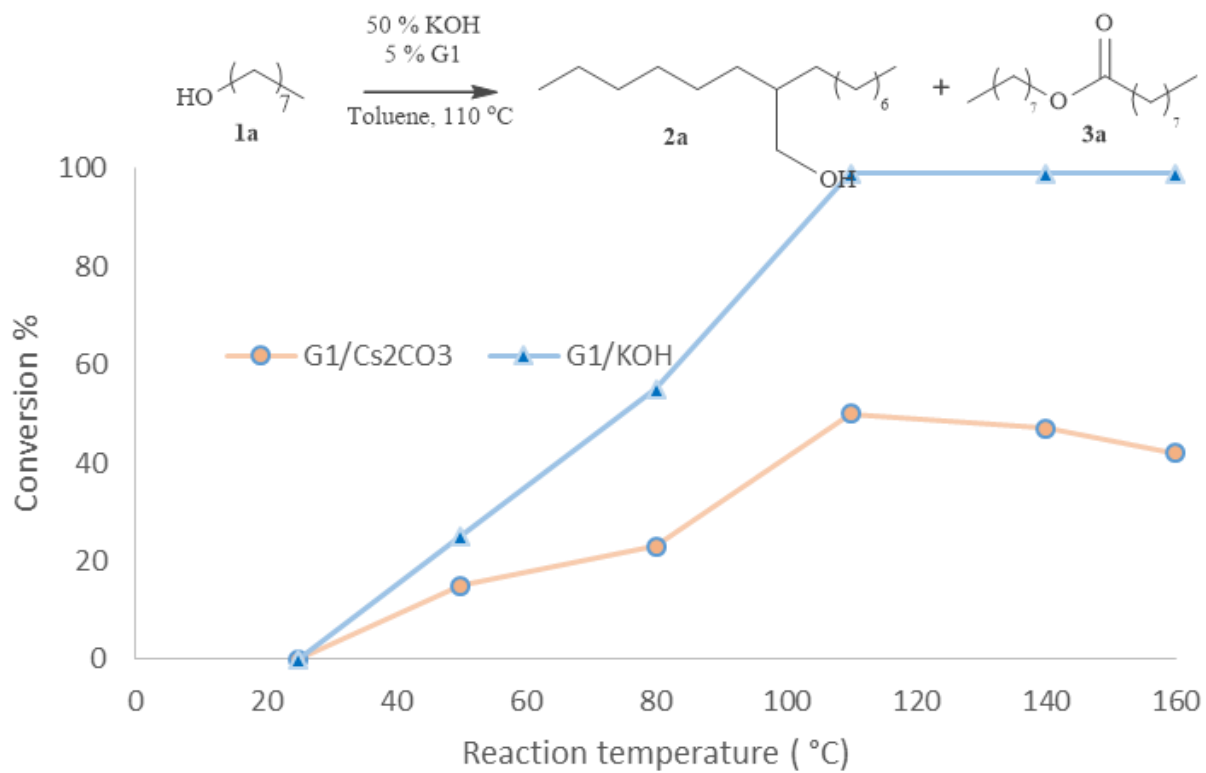

**Graph S3.** The effect of reaction temperature on conversion rate of dehydrogenative alcohol coupling of 1-octanol ( p-xylene and mesitylene was used for experiments conducted at 140 and 160 °C, respectively.)

## **MECHANISTIC STUDIES**

### **1. Representative procedure for 1-octanal coupling reactions**

#### **1.1. Mechanistic studies utilizing 1-octanal and Base**

Base (KOH, Cs<sub>2</sub>CO<sub>3</sub>, NaOMe or KOtBu, 0.122 mmol) and 1-octanal (0.244 mmol) in dry toluene (1 mL) were added to a Schlenk reactor under nitrogen atmosphere. The reactor was heated to 110 °C in a preheated oil bath and magnetically stirred. Samples regularly were withdrawn from the reaction mixture, diluted with methanol and analyzed by GC/MS.

#### **1.2. Mechanistic studies utilizing 1-octanal, Base and PCy<sub>3</sub>**

Base (KOH, Cs<sub>2</sub>CO<sub>3</sub>, NaOMe or KOtBu, 0.122 mmol), PCy<sub>3</sub> (0.0244 mmol) and 1-octanal (0.244 mmol) in dry toluene (1 mL) were added to a Schlenk reactor under nitrogen atmosphere. The reactor was heated to 110 °C in a preheated oil bath and magnetically stirred. Samples regularly were withdrawn from the reaction mixture, diluted with methanol and analyzed by GC/MS.

#### **1.3. G1 (HG2) catalyzed coupling reactions utilizing 1-octanal and Cs<sub>2</sub>CO<sub>3</sub> (KOH)/PCy<sub>3</sub>**

G1 or HG2 (0.0122 mmol), Base (KOH, Cs<sub>2</sub>CO<sub>3</sub>, NaOMe or KOtBu, 0.122 mmol), PCy<sub>3</sub> (0.0244 mmol) and 1-octanal (0.244 mmol) in dry toluene (1 mL) were added to a Schlenk reactor under nitrogen atmosphere. The reactor was heated to 110 °C in a preheated oil bath and magnetically stirred. Samples regularly were withdrawn from the reaction mixture, diluted with methanol and analyzed by GC/MS.

## 2. Representative procedure for 1-octanal and 1-octanol coupling reactions

### 2.1. Mechanistic studies utilizing 1-octanal/1-octanol and Cs<sub>2</sub>CO<sub>3</sub> and KOH

Base (KOH, Cs<sub>2</sub>CO<sub>3</sub>, NaOMe or KOtBu, 0.122 mmol) and 1-octanal (0.244 mmol) and 1-octanol (0.244 mmol) in dry toluene (1 mL) were added to a Schlenk reactor under nitrogen atmosphere. The reactor was heated to 110 °C in a preheated oil bath and magnetically stirred. Samples regularly were withdrawn from the reaction mixture, diluted with methanol and analyzed by GC/MS.

### 2.2. Mechanistic studies utilizing 1-octanal and Cs<sub>2</sub>CO<sub>3</sub> (KOH)/PCy<sub>3</sub>

Base (KOH, Cs<sub>2</sub>CO<sub>3</sub>, NaOMe or KOtBu, 0.122 mmol), PCy<sub>3</sub> (0.0244 mmol), 1-octanal (0.244 mmol) and 1-octanol (0.244 mmol) in dry toluene (1 mL) were added to a Schlenk reactor under nitrogen atmosphere. The reactor was heated to 110 °C in a preheated oil bath and magnetically stirred. Samples regularly were withdrawn from the reaction mixture, diluted with methanol and analyzed by GC/MS.

### 2.3. G1 (HG2) catalyzed coupling reactions utilizing 1-octanal and Cs<sub>2</sub>CO<sub>3</sub> (KOH)/PCy<sub>3</sub>

G1 or HG2 (0.0122 mmol), Base (KOH, Cs<sub>2</sub>CO<sub>3</sub>, NaOMe or KOtBu, 0.122 mmol), PCy<sub>3</sub> (0.0244 mmol) and 1-octanal (0.244 mmol) in dry toluene (1 mL) were added to a Schlenk reactor under nitrogen atmosphere. The reactor was heated to 110 °C in a preheated oil bath and magnetically stirred. Samples regularly were withdrawn from the reaction mixture, diluted with methanol and analyzed by GC/MS.

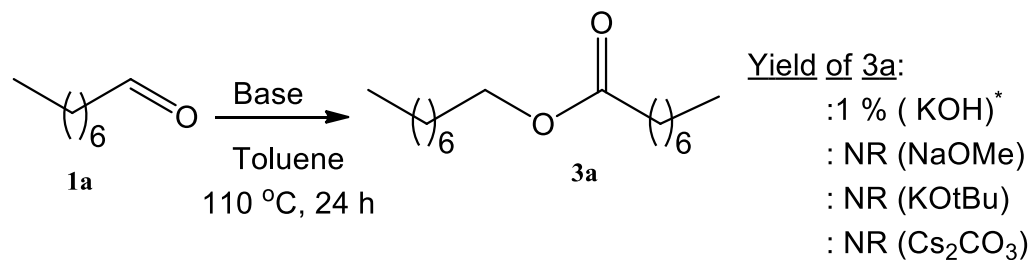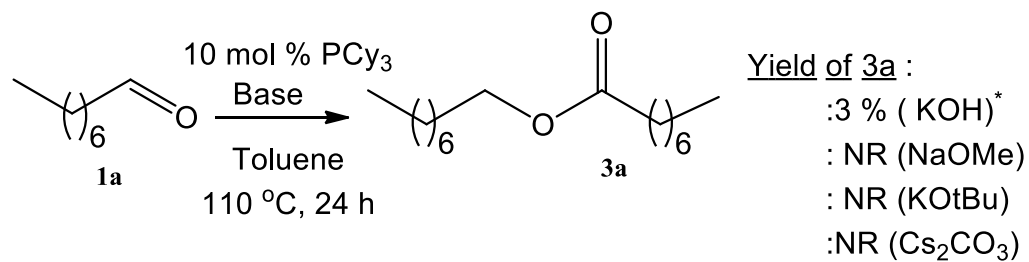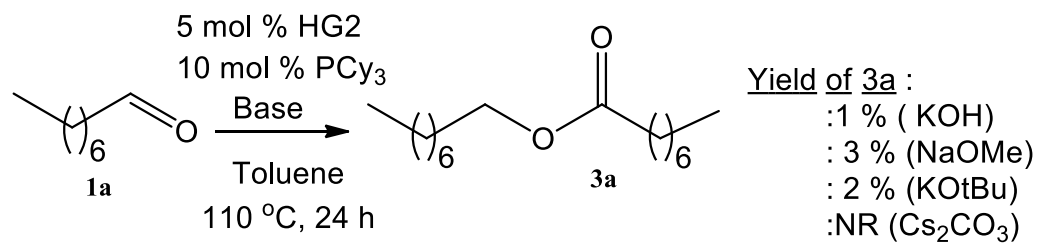

**Scheme S1.** The reaction of 1-octanal in the absence and presence of HG2



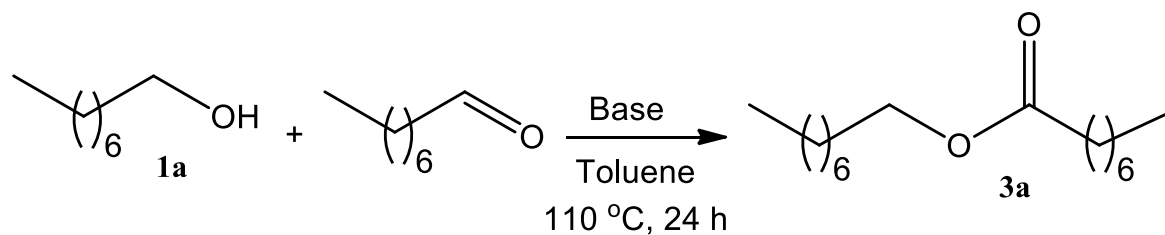

Yield of 3a : 38 % ( KOH)\*  
 : 32 % ( NaOMe)  
 : 34 % ( KOtBu)  
 : 36 % ( Cs<sub>2</sub>CO<sub>3</sub>)

\* octanoic acid is formed in 8 % yield

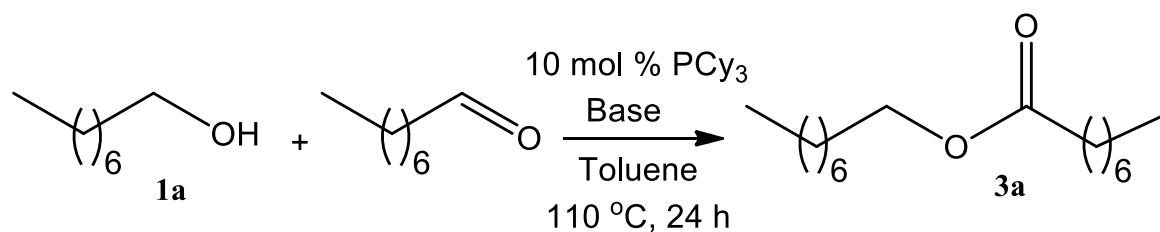

Yield of 3a: 38 % ( KOH)\*  
 : 33 % ( NaOMe)  
 : 34 % ( KOtBu)  
 : 35 % ( Cs<sub>2</sub>CO<sub>3</sub>)

\* octanoic acid is formed in 10 % yield

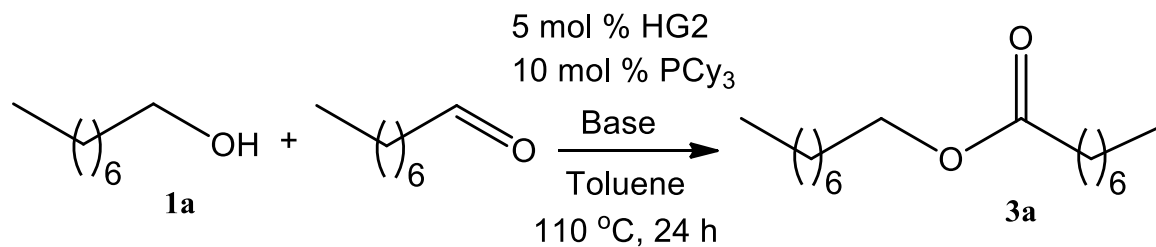

Yield of 3a : 80% ( KOH)\*  
 : 82 % ( NaOMe)  
 : 60 % ( KOtBu)  
 : 82 ( Cs<sub>2</sub>CO<sub>3</sub>)

\* octanoic acid is formed in 12 % yield

**Scheme S2.** The reaction of 1-octanal/1-octanol mixture in the absence and presence of HG2



**Spectroscopic datas for the selected compounds:**

**2-hexyyl-1-decanol (2a)**

$^1\text{H}$  NMR (400 MHz,  $\text{CDCl}_3$ )  $\delta$  3.48 (d,  $J = 5.1$  Hz, 2H), 1.20 (m, 26H), 0.81 (t, 6H)

$^{13}\text{C}$  NMR (100 MHz,  $\text{CDCl}_3$ )  $\delta$  65.85, 40.16, 31.89, 30.85, 29.94, 29.35, 22.34, 14.13

MS (EI, m/z)  $[\text{M}]^+$ : 242

**Octyl octanoate (3a)**

$^1\text{H}$  NMR (400 MHz,  $\text{CDCl}_3$ )  $\delta$  3.99 (t,  $J = 6.4$  Hz, 2H), 2.22 (t,  $J = 7.5$  Hz, 2H), 1.55 (m, 4H), 1.22 (s, 18H), 0.81 (t, 6H).

$^{13}\text{C}$  NMR (100 MHz,  $\text{CDCl}_3$ )  $\delta$  173.80, 63.91, 34.08, 31.90, 29.34, 25.80, 25.21, 22.61, 13.86

MS (EI, m/z)  $[\text{M}]^+$ : 256

**Octanoic acid (4a)**

$^1\text{H}$  NMR (400 MHz,  $\text{CDCl}_3$ )  $\delta$  12.00 (s, 1H), 2.35 (t,  $J = 7.5$  Hz, 2H), 1.71 – 1.57 (m, 2H), 1.53 – 1.12 (m, 9H), 0.89 (t,  $J = 9.9$ , 3H)

$^{13}\text{C}$  NMR (100 MHz,  $\text{CDCl}_3$ )  $\delta$  180.81, 33.47, 31.63, 28.91, 24.65, 22.59, 14.00

MS (EI, m/z)  $[\text{M}]^+$ : 158 (methyl ester derivative)

**Benzyl benzoate (3b)**

$^1\text{H}$  NMR (400 MHz,  $\text{CDCl}_3$ )  $\delta$  8.08 (d,  $J = 7.9$  Hz, 2H), 7.70 – 7.15 (m, 8H), 5.36 (s, 2H).

$^{13}\text{C}$  NMR (100 MHz,  $\text{CDCl}_3$ )  $\delta$  166.92, 136.01, 133.11, 130.18, 129.77, 128.67, 128.45, 128.32, 128.24, 67.12

MS (EI, m/z)  $[\text{M}]^+$ : 212

**Benzoic acid (4b)**

$^1\text{H}$  NMR (400 MHz,  $\text{CDCl}_3$ )  $\delta$  13.00-12.00 (s, 1H), 8.13 (d,  $J = 8.4$  Hz, 2H), 7.63 (t,  $J = 7.4$  Hz, 1H), 7.51 (t,  $J = 7.7$  Hz, 2H).

$^{13}\text{C}$  NMR (100 MHz,  $\text{CDCl}_3$ )  $\delta$  172.59, 133.88, 130.49, 129.07, 128.21

MS (EI, m/z)  $[\text{M}]^+$ : 136 (methyl ester derivative)

### **Cinnamyl Cinnamate (2g)**

$^1\text{H}$  NMR (400 MHz,  $\text{CDCl}_3$ )  $\delta$  7.61 (d,  $J = 16.0$  Hz, 2H), 7.26 (m, 10H), 6.56 (d,  $J = 15.9$  Hz, 1H), 6.36 (d,  $J = 17.1$  Hz, 1H), 6.22 (ddd,  $J = 13.7$ , 6.3, 4.9 Hz, 1H), 4.73 (d,  $J = 6.3$  Hz, 2H).

$^{13}\text{C}$  NMR (100 MHz,  $\text{CDCl}_3$ )  $\delta$  166.69, 145.33, 136.22, 134.29, 130.47, 129.02, 128.69, 128.21, 126.79, 123.43, 118.02, 65.24.

MS (EI, m/z)  $[\text{M}]^+$ : 264

### **10-undecen-1-yl-10-undecenoate (2e)**

$^1\text{H}$  NMR (400 MHz,  $\text{CDCl}_3$ )  $\delta$  5.85 (m, 2H), 5.05 (m, 4 H), 4.10 (t,  $J = 6.7$  Hz, 2H), 2.33 (t,  $J = 7.5$  Hz, 2H), 2.07 (t,  $J = 10.4$  Hz, 4H), 1.85 – 1.59 (m, 4H), 1.56 – 1.19 (m, 24H).

$^{13}\text{C}$  NMR (100 MHz,  $\text{CDCl}_3$ )  $\delta$  174.08, 139.15, 114.14, 64.39, 51.28, 34.09, 33.24, 31.75, 29.47, 29.21, 28.89, 26.03, 24.61, 22.05

MS (EI, m/z)  $[\text{M}]^+$ : 336

### **Undecyl undecanoate**

$^1\text{H}$  NMR (400 MHz,  $\text{CDCl}_3$ )  $\delta$  4.09 (t,  $J = 6.4$  Hz, 2H), 2.29 (t,  $J = 7.6$  Hz, 2H), 1.62 (m, 4H), 1.29 (m, 30H), 0.88 (t, 6H).

$^{13}\text{C}$  NMR (100 MHz,  $\text{CDCl}_3$ )  $\delta$  178.76, 64.38, 34.31, 31.40, 31.05, 25.73, 25.10, 24.90, 24.34, 23.10, 22.21

MS (EI, m/z)  $[\text{M}]^+$ : 340

### **$\gamma$ -Butyrolactone**

$^1\text{H}$  NMR (400 MHz,  $\text{CDCl}_3$ )  $\delta$  4.35 (t,  $J = 7.1$  Hz, 2H), 2.49 (t,  $J = 6.9$  Hz, 2H), 2.23 (m, 2H)

$^{13}\text{C}$  NMR (100 MHz,  $\text{CDCl}_3$ )  $\delta$  173.48, 66.79, 22.88, 22.58

MS (EI, m/z)  $[\text{M}]^+$ : 86

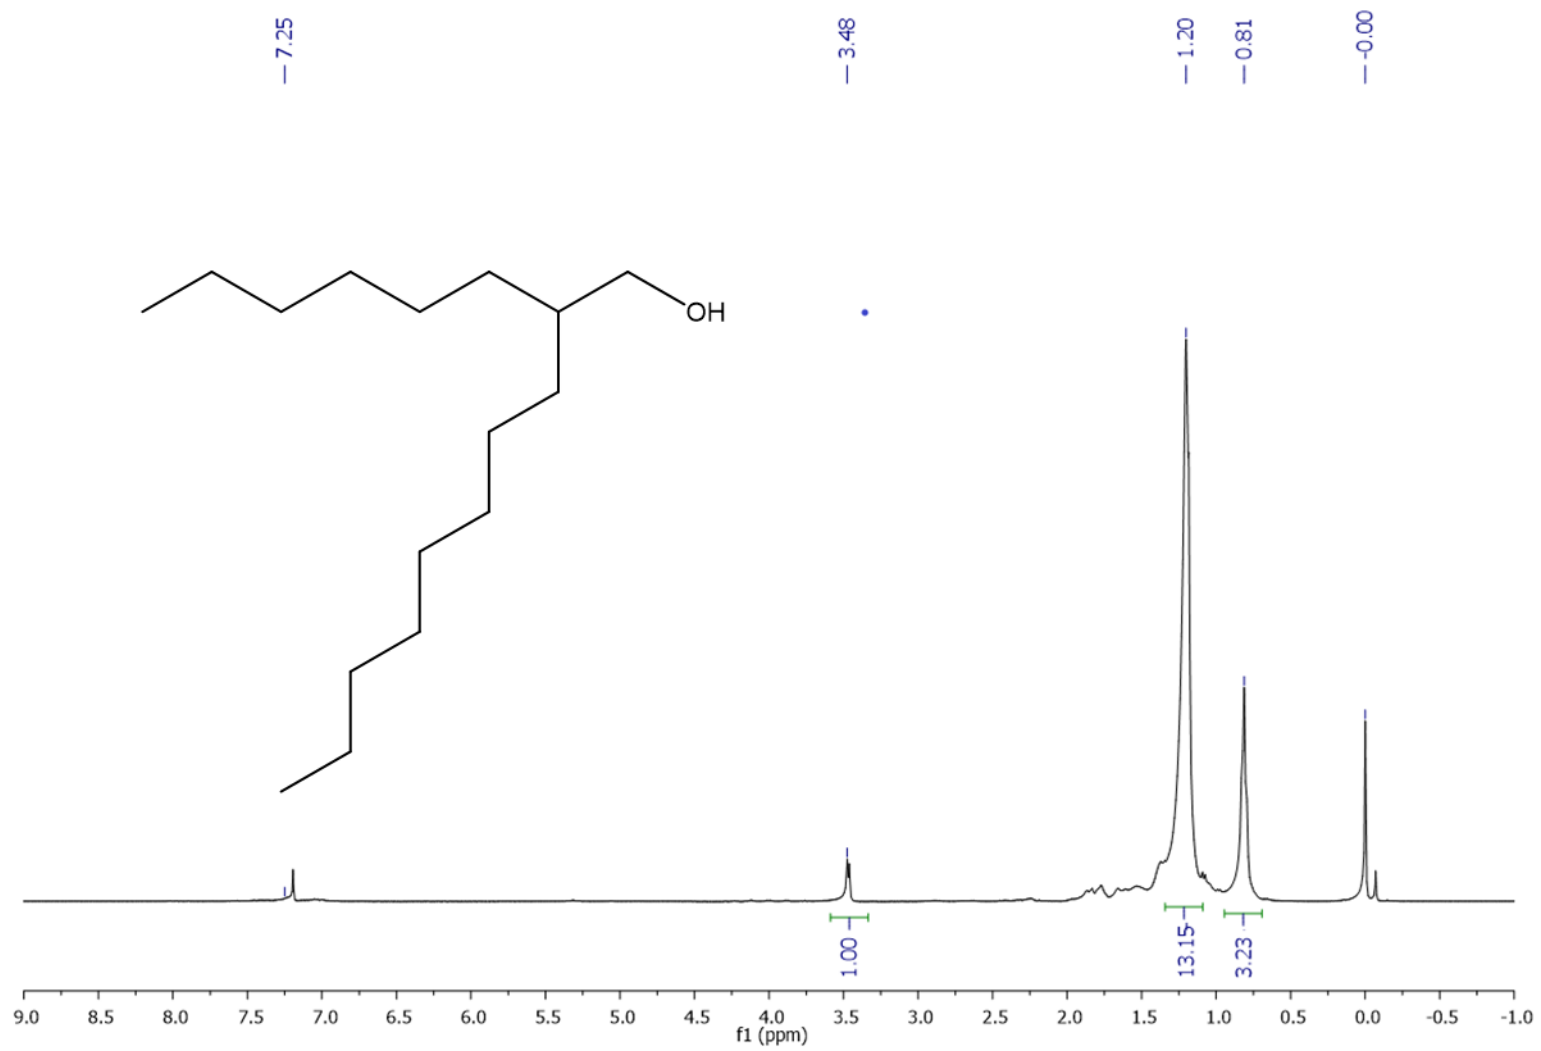

**Figure S1.**  $^1\text{H}$  NMR spectrum of 2-hexyl-1-decanol (400 MHz,  $\text{CDCl}_3$ )

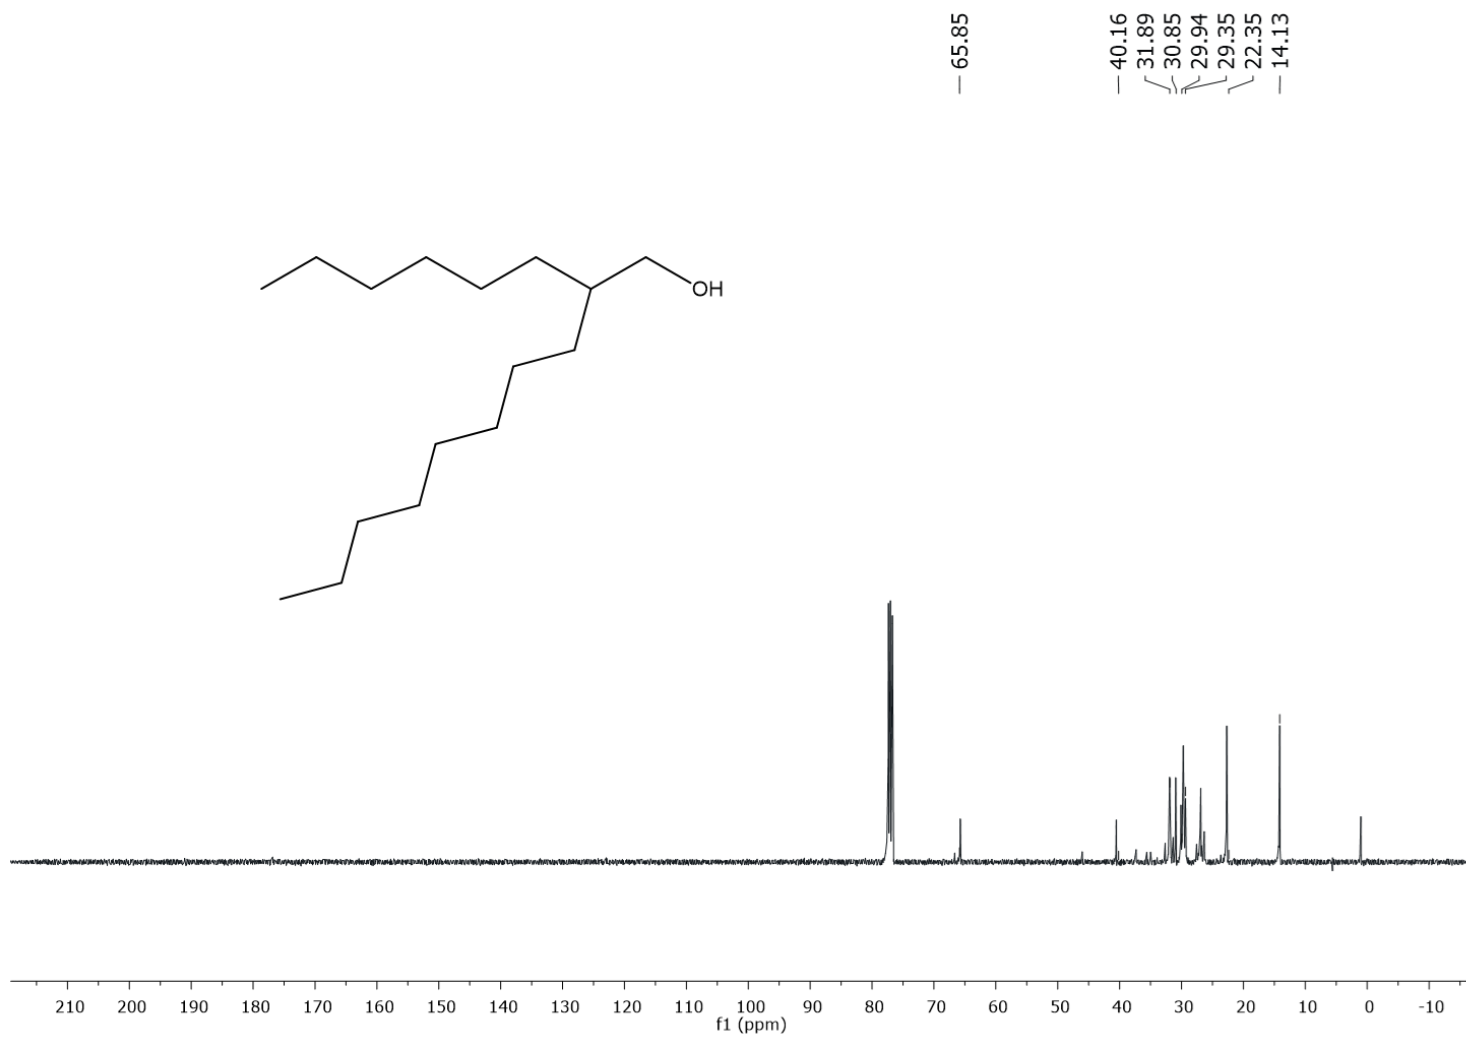

Figure S2.  $^{13}\text{C}$  NMR spectrum of 2-hexyl-1-decanol (100 MHz,  $\text{CDCl}_3$ )

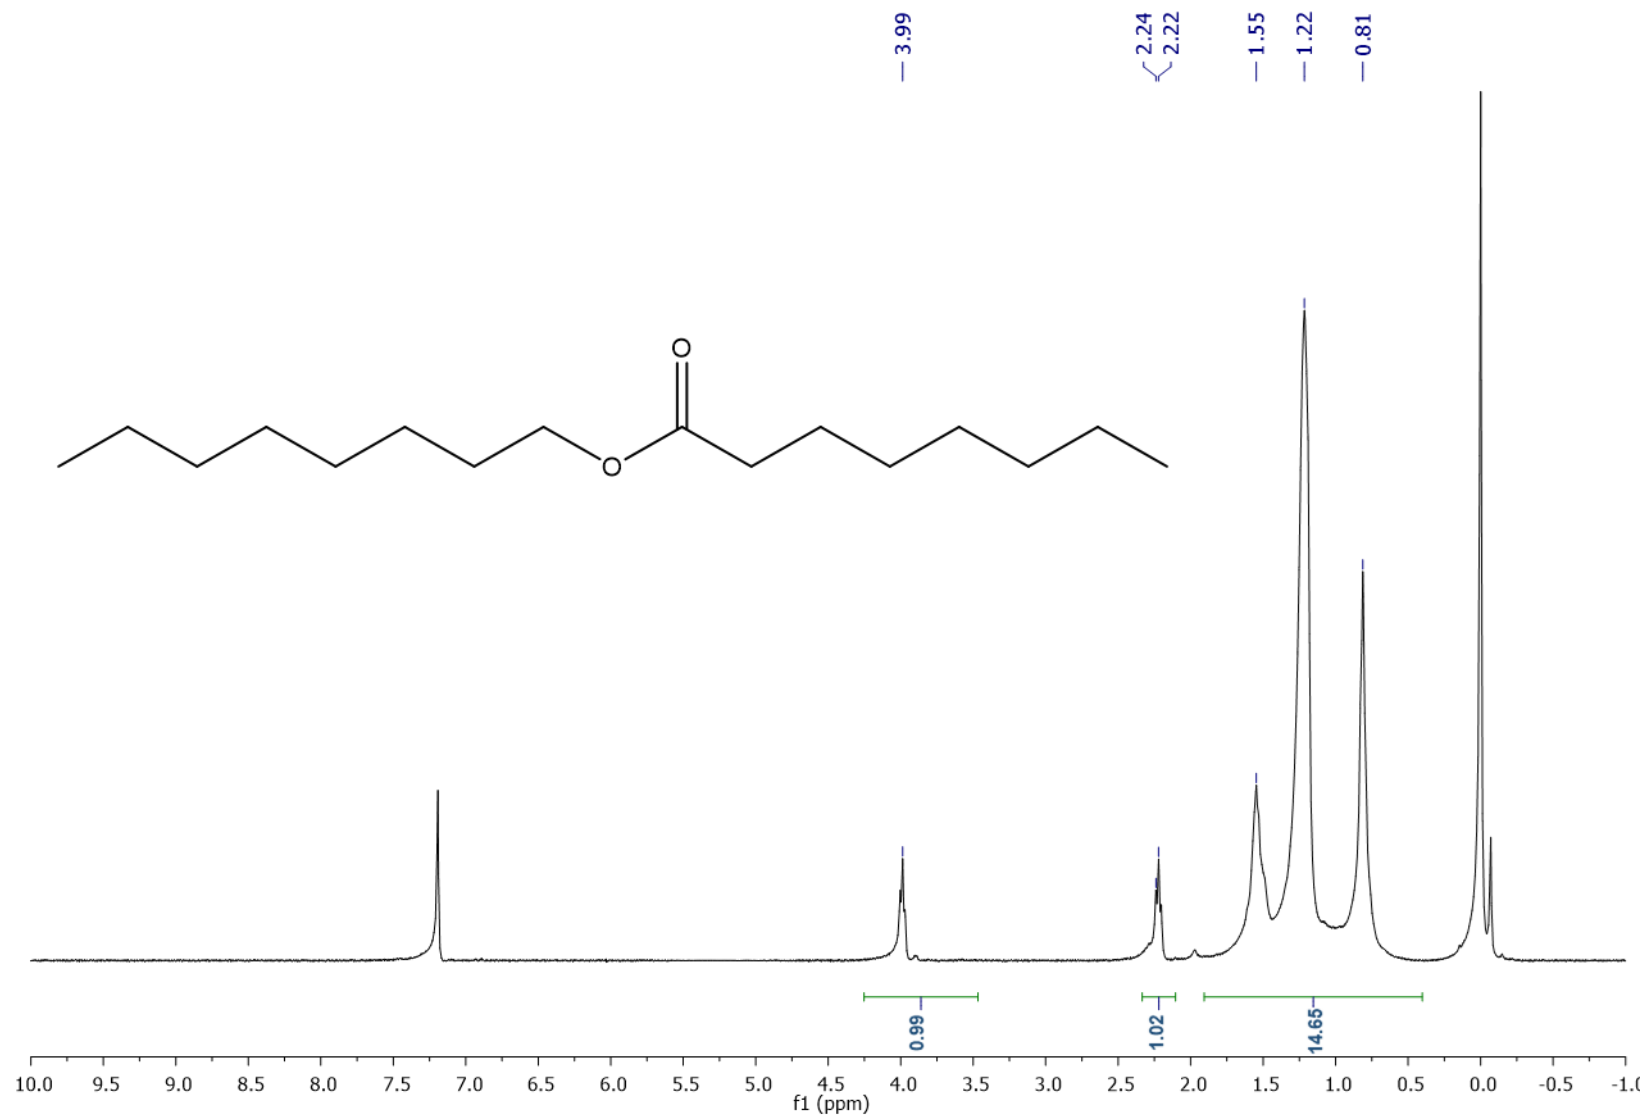

Figure S3.  $^1\text{H}$  NMR spectrum of octyl octanoate (400 MHz,  $\text{CDCl}_3$ )

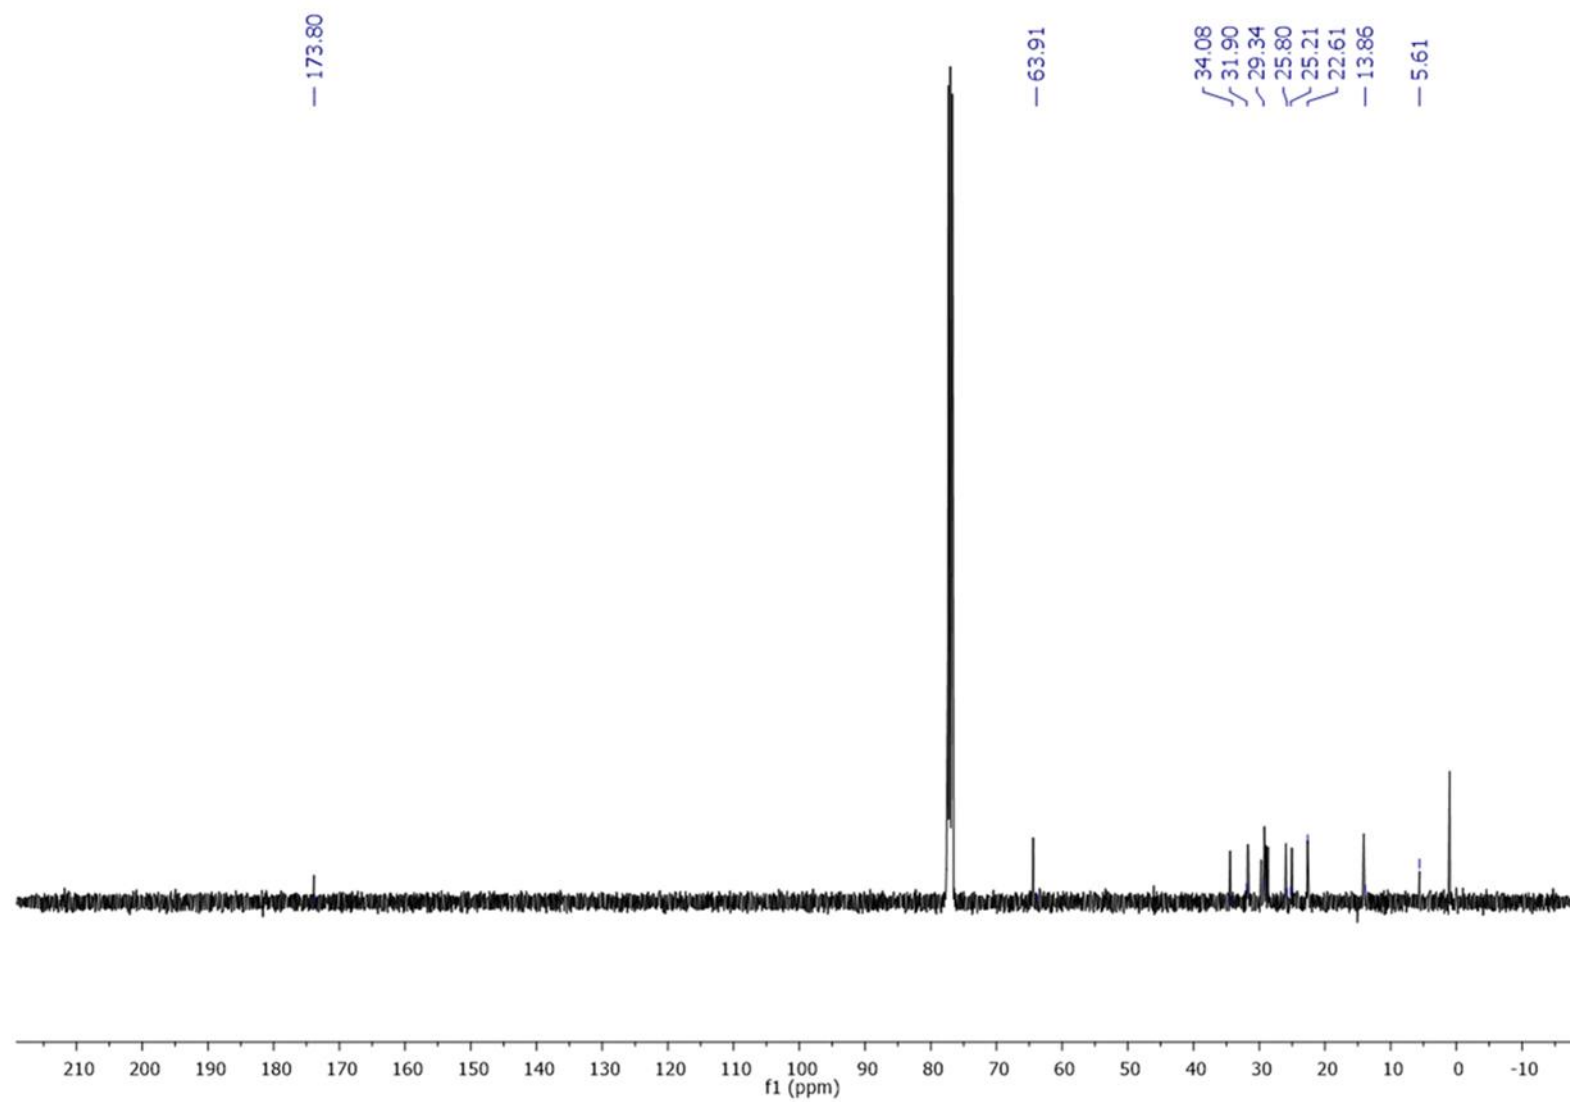



**Figure S4.**  $^{13}\text{C}$  NMR spectrum of octyl octanoate (100 MHz,  $\text{CDCl}_3$ )

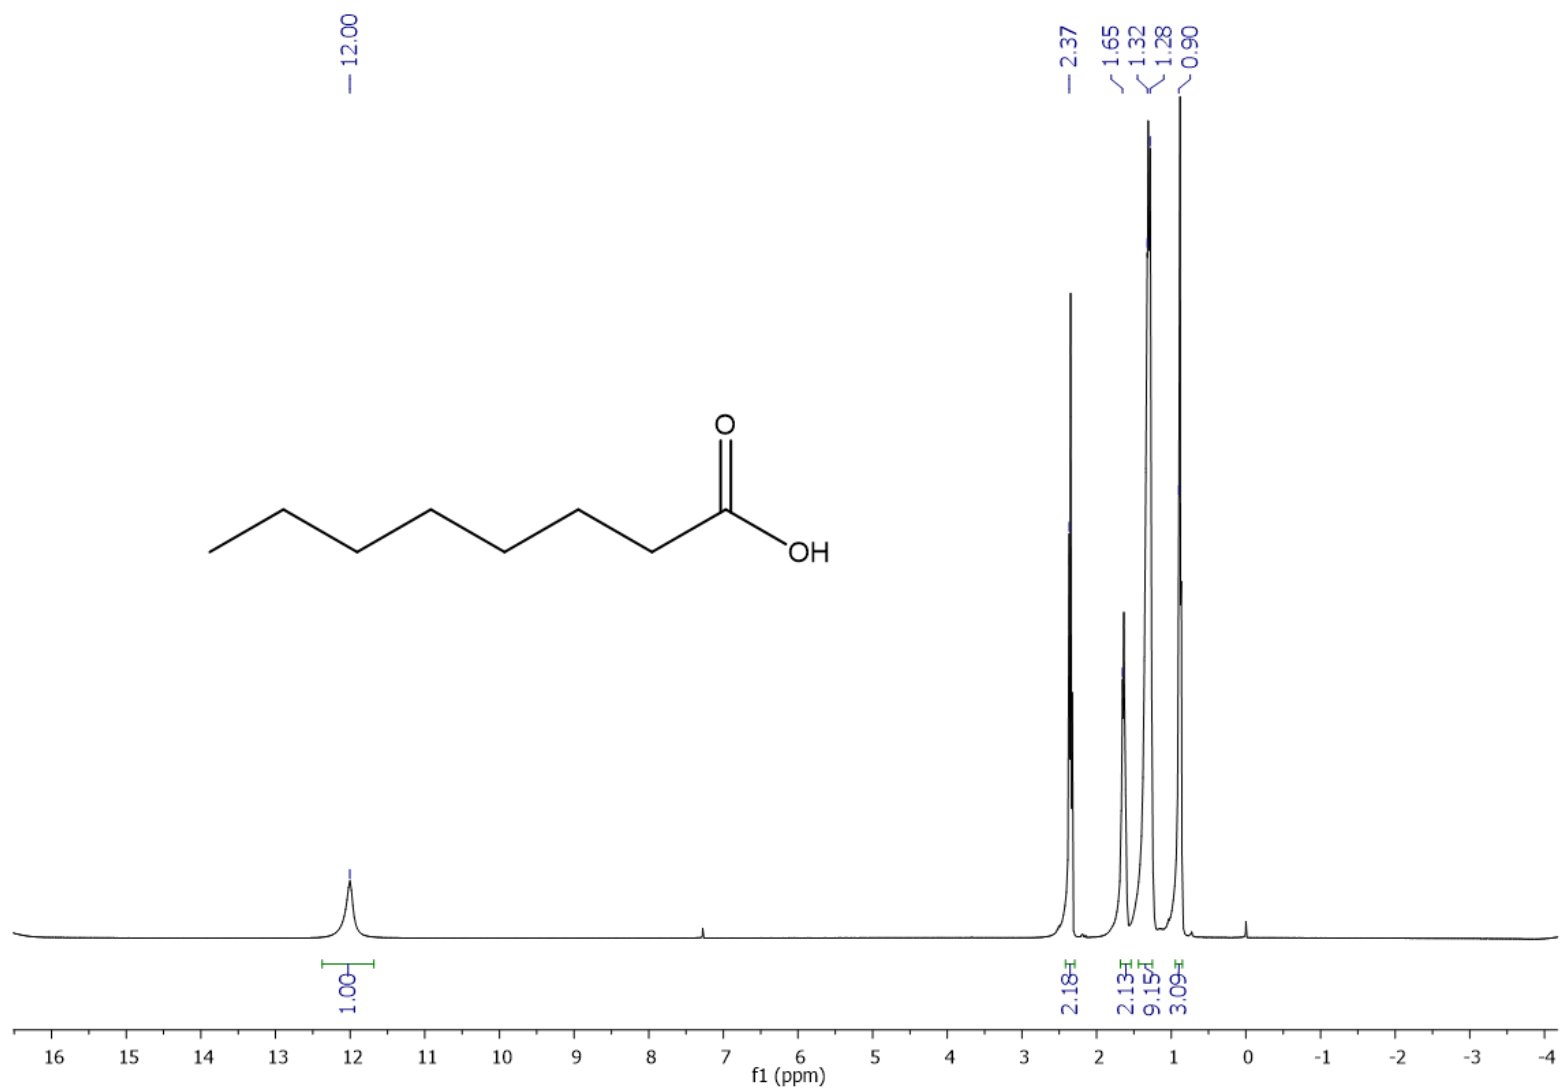

**Figure S5.**  $^1\text{H}$  NMR spectrum of octanoic acid (400 MHz,  $\text{CDCl}_3$ )

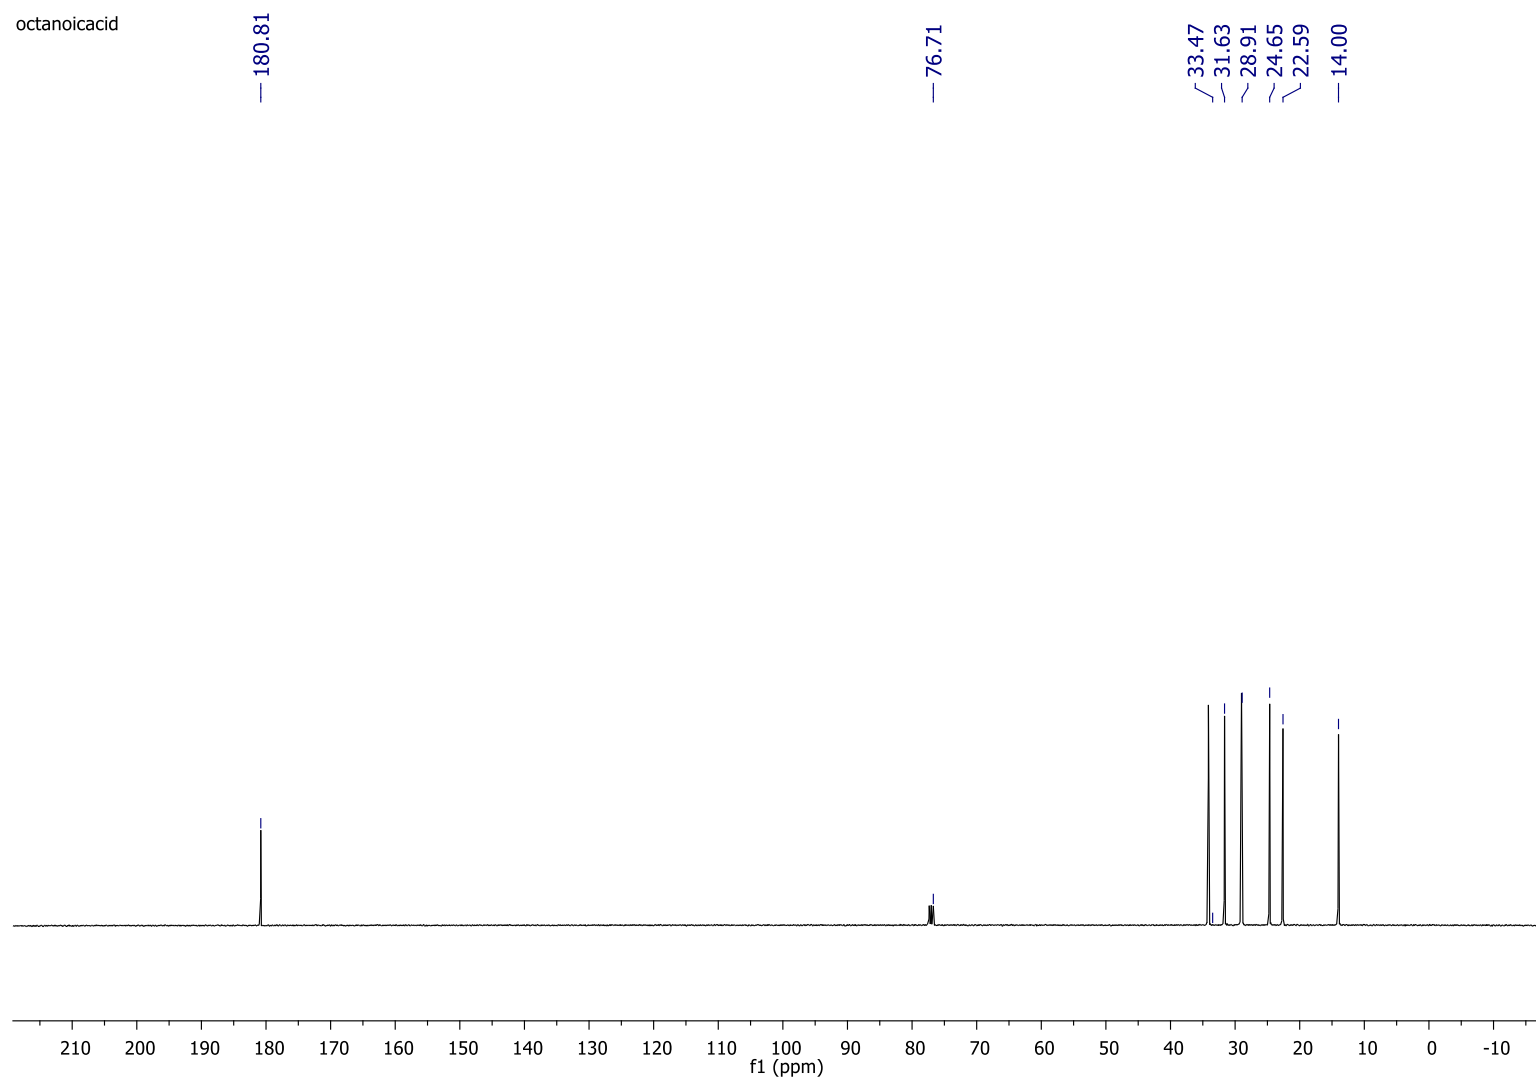

**Figure S6.**  $^{13}\text{C}$  NMR spectrum of octanoic acid (100 MHz,  $\text{CDCl}_3$ )

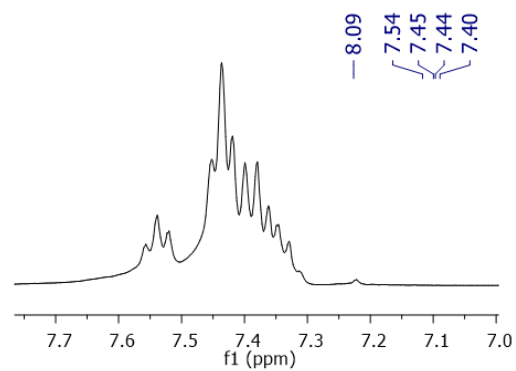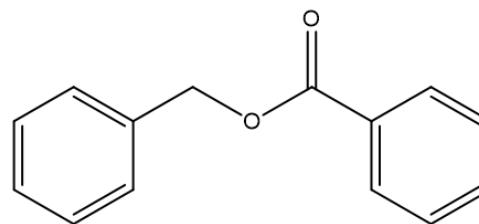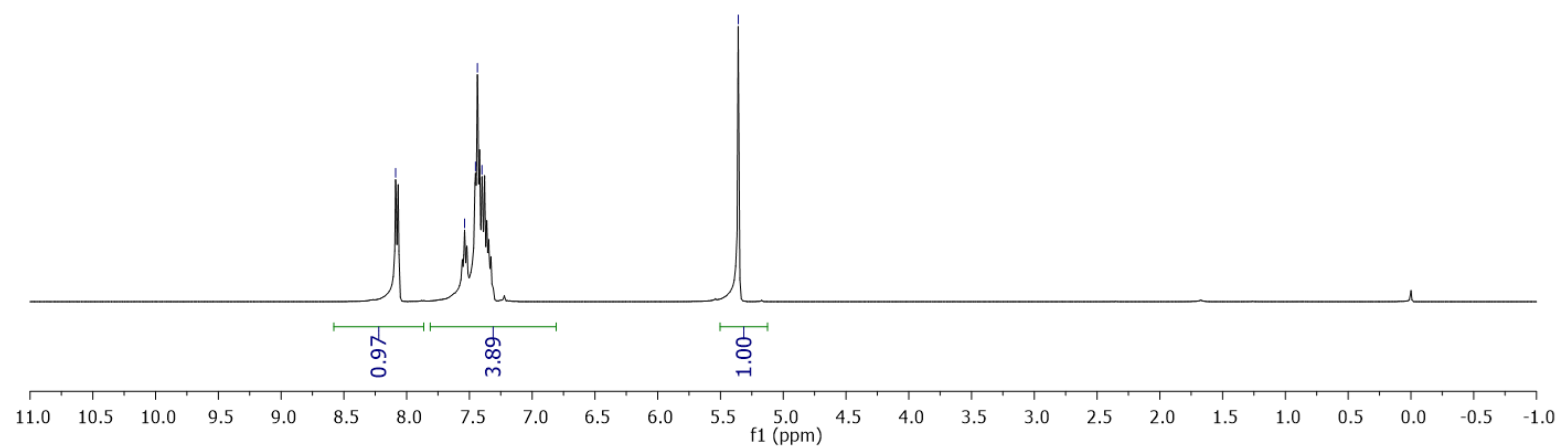

**Figure S7.**  $^1\text{H}$  NMR spectrum of benzyl benzoate (400 MHz,  $\text{CDCl}_3$ )

benzylbenzoate

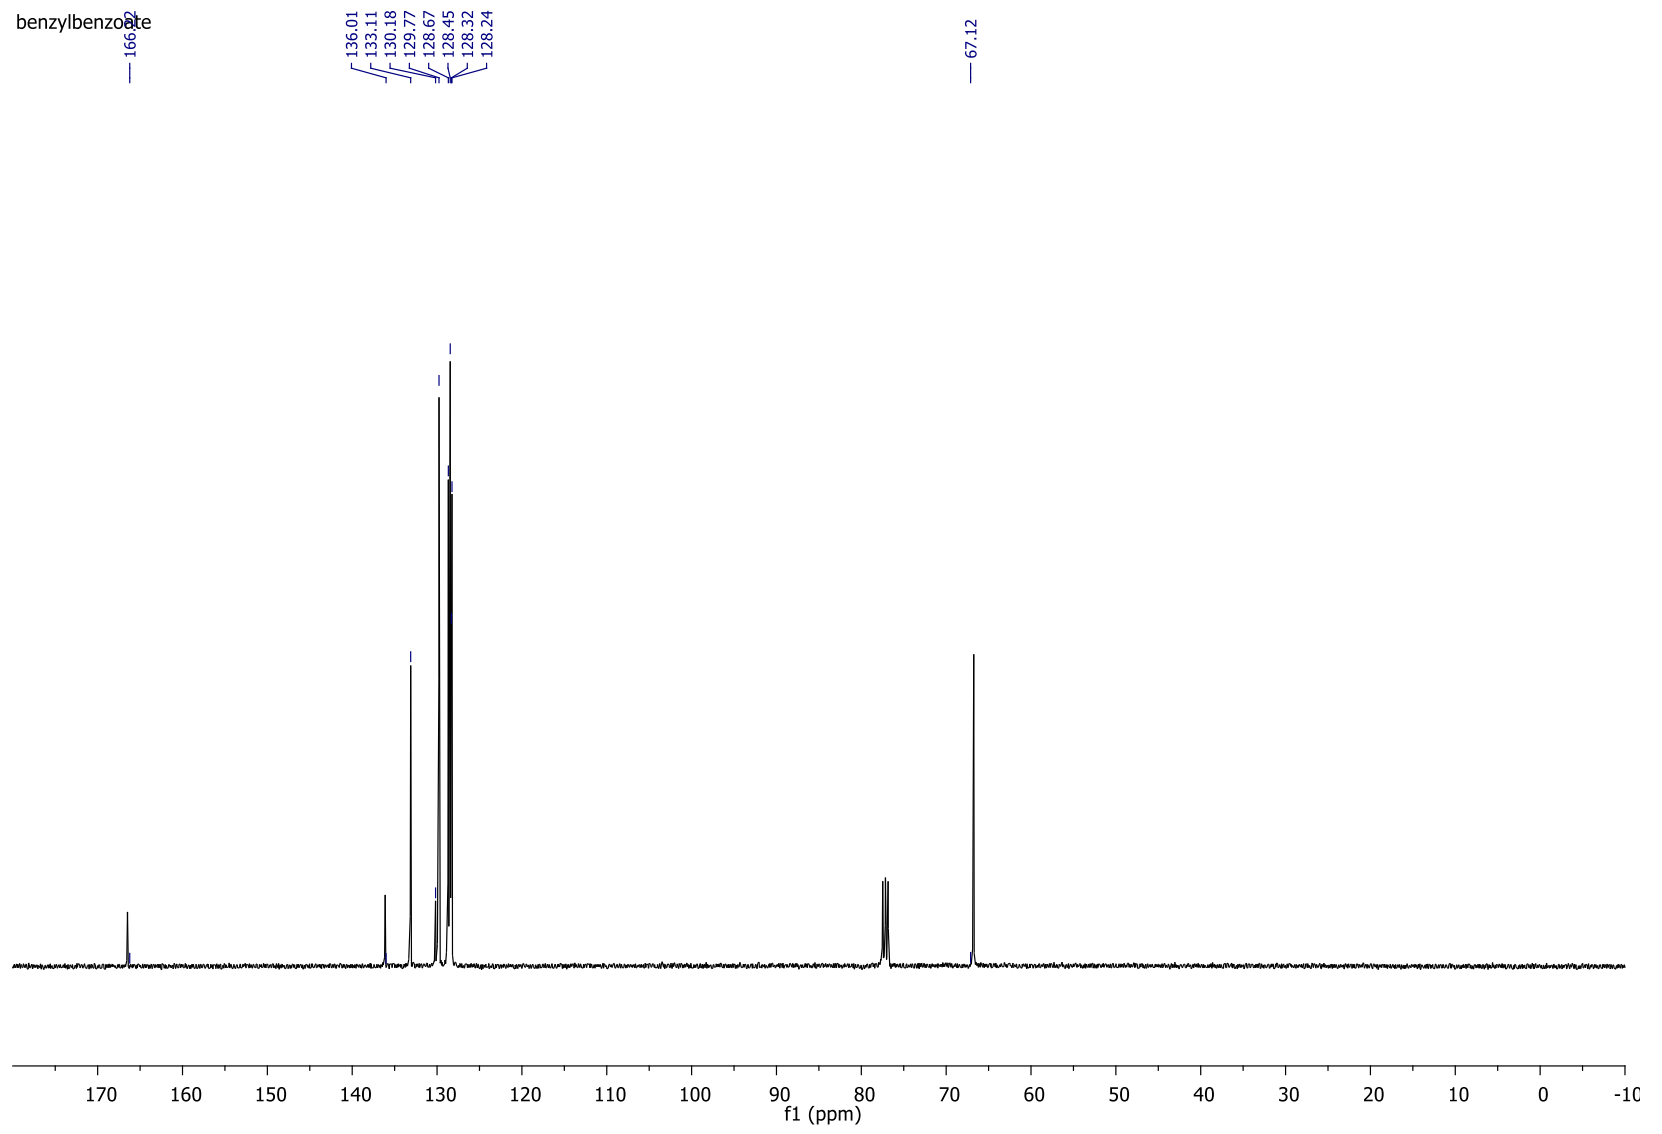

**Figure S8.**  $^{13}\text{C}$  NMR spectrum of benzyl benzoate (100 MHz,  $\text{CDCl}_3$ )

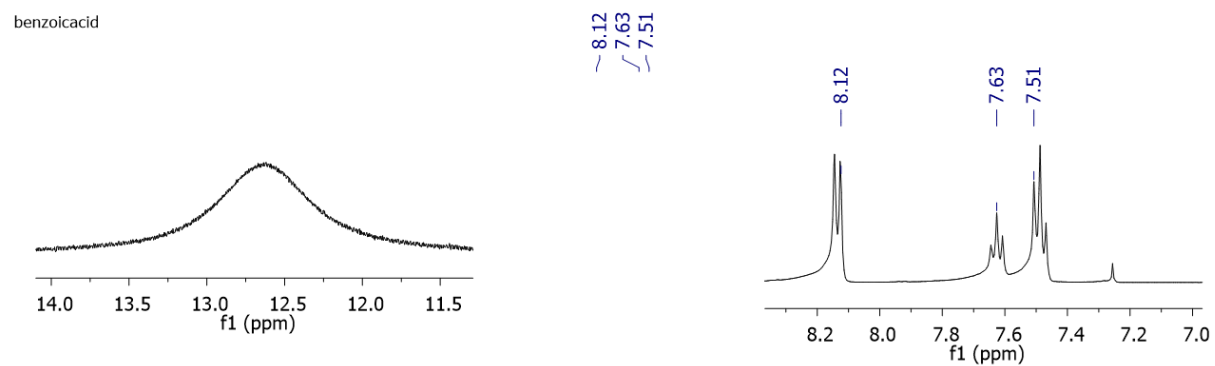

8.12  
7.63  
7.51

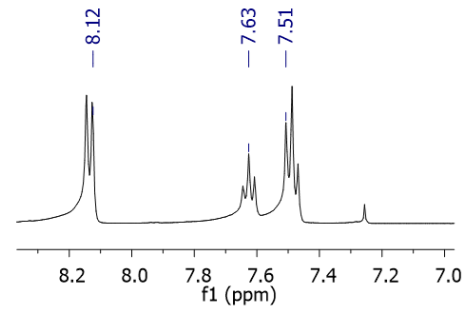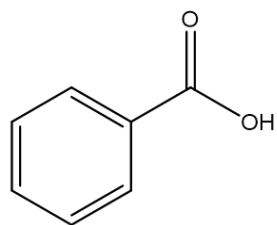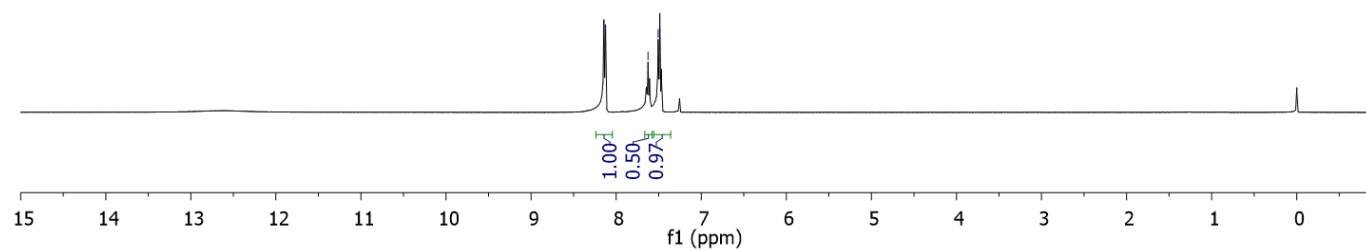

**Figure S9.**  $^1\text{H}$  NMR spectrum of benzoic acid (400 MHz,  $\text{CDCl}_3$ )

benzoic acid

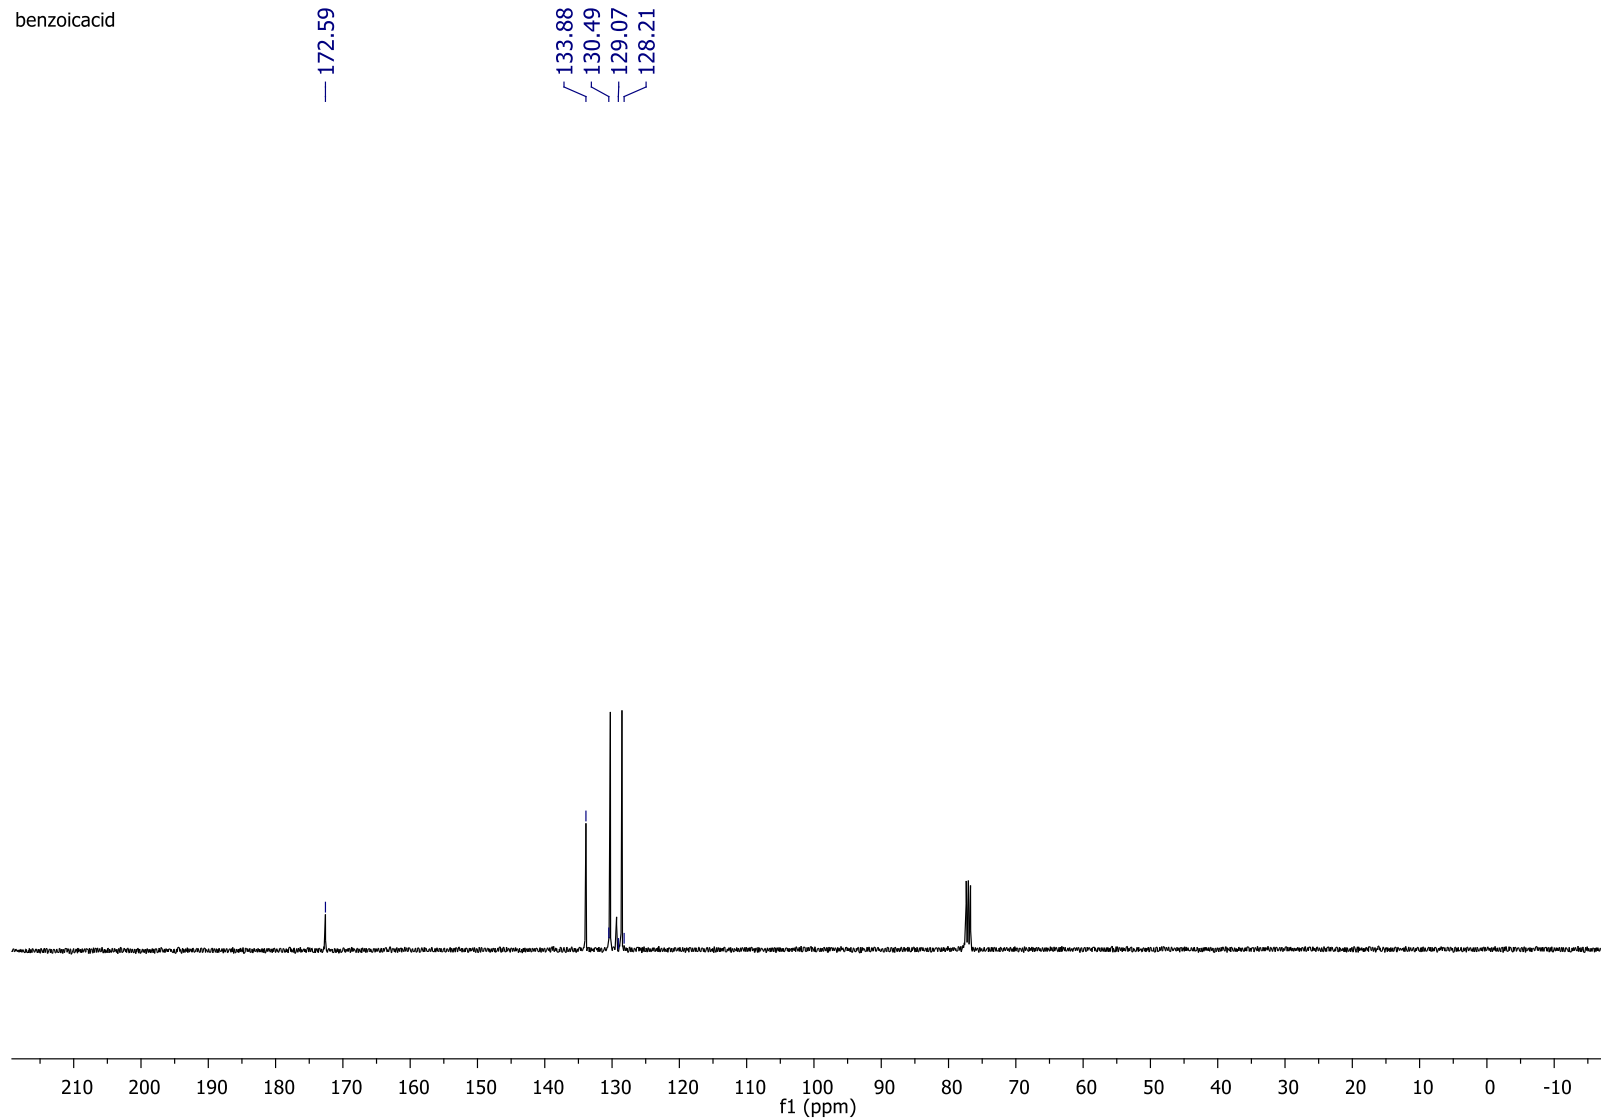

Figure S10.  $^{13}\text{C}$  NMR spectrum of benzoic acid (100 MHz,  $\text{CDCl}_3$ )

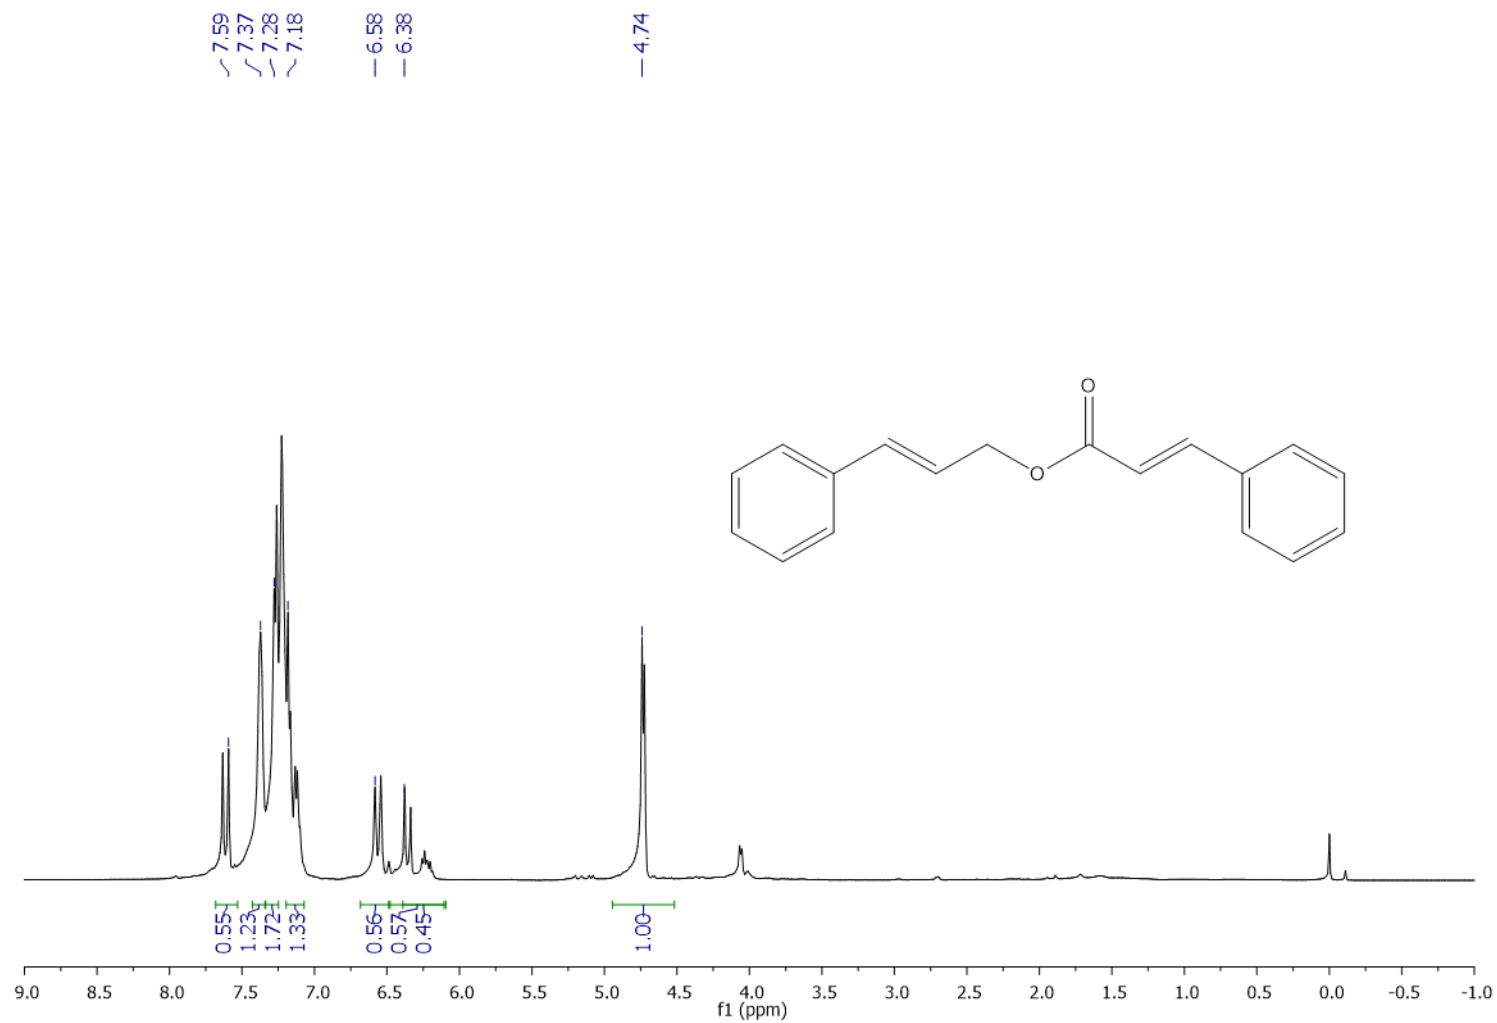

**Figure S11.** <sup>1</sup>H NMR spectrum of cinnamyl cinnamate (400 MHz, CDCl<sub>3</sub>)

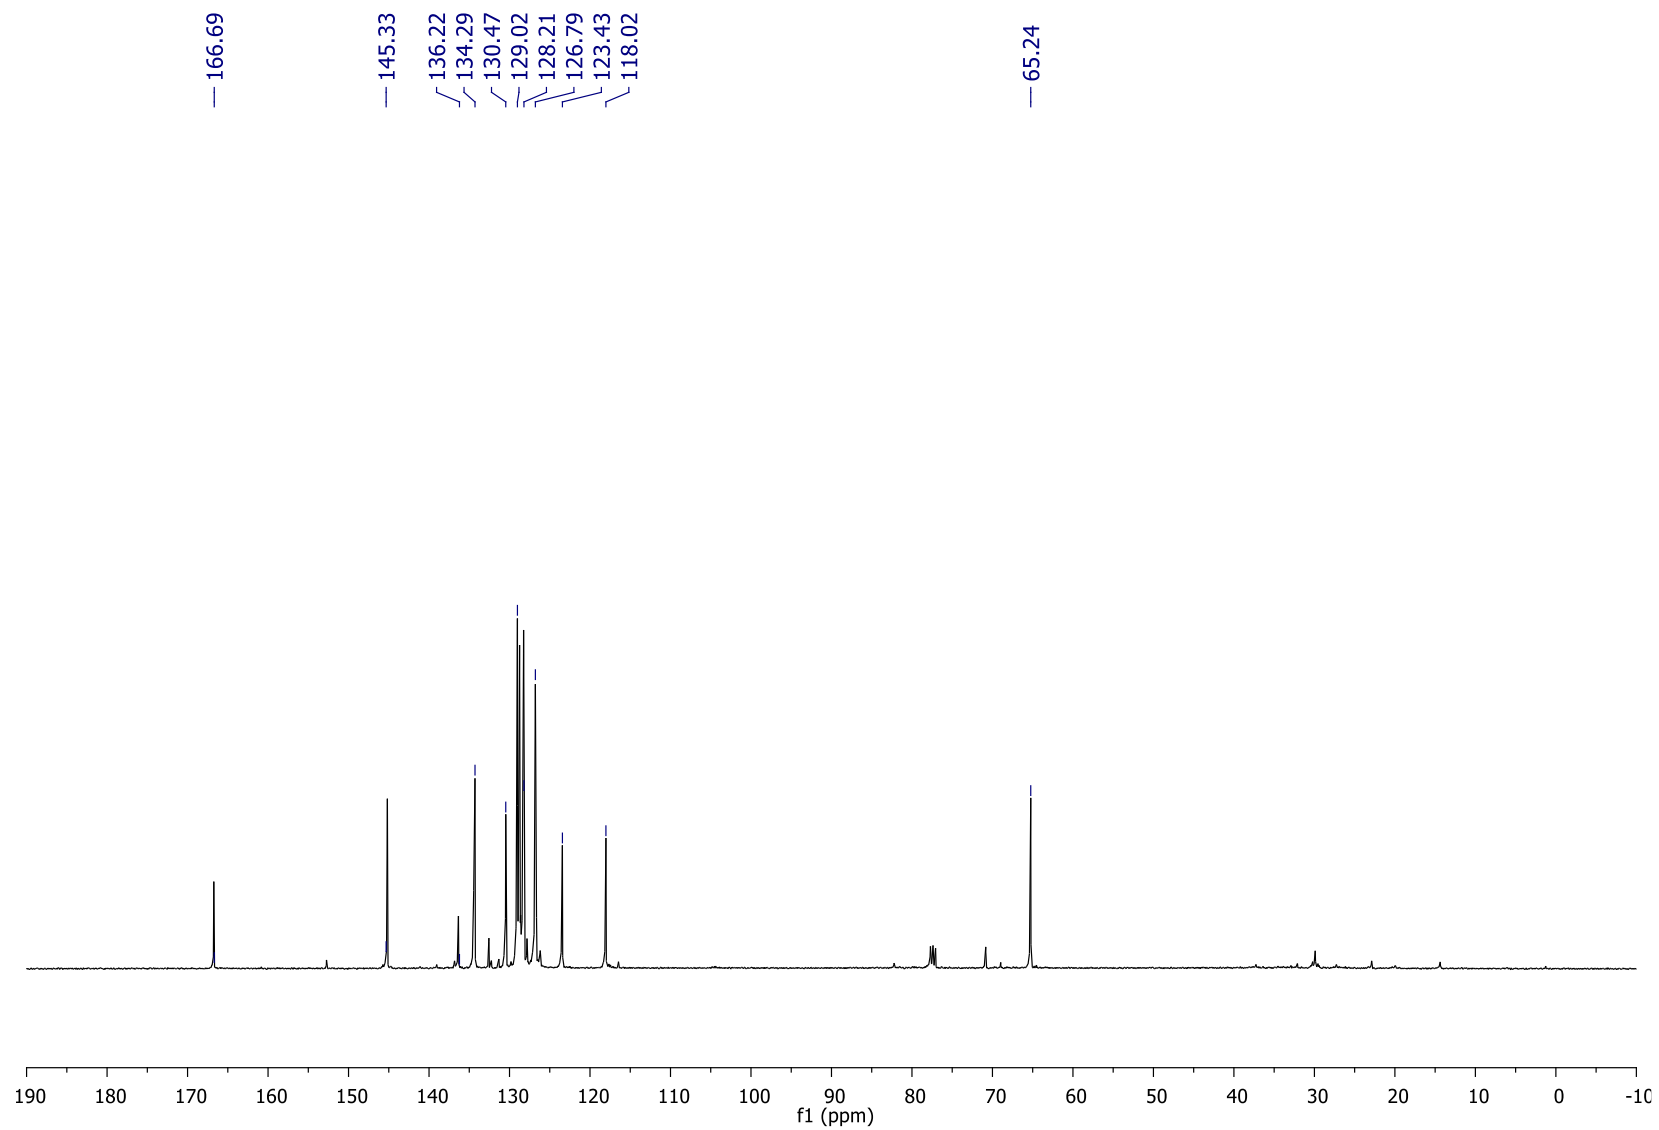

**Figure S12.**  $^{13}\text{C}$  NMR spectrum of cinnamyl cinnamate (100 MHz,  $\text{CDCl}_3$ )



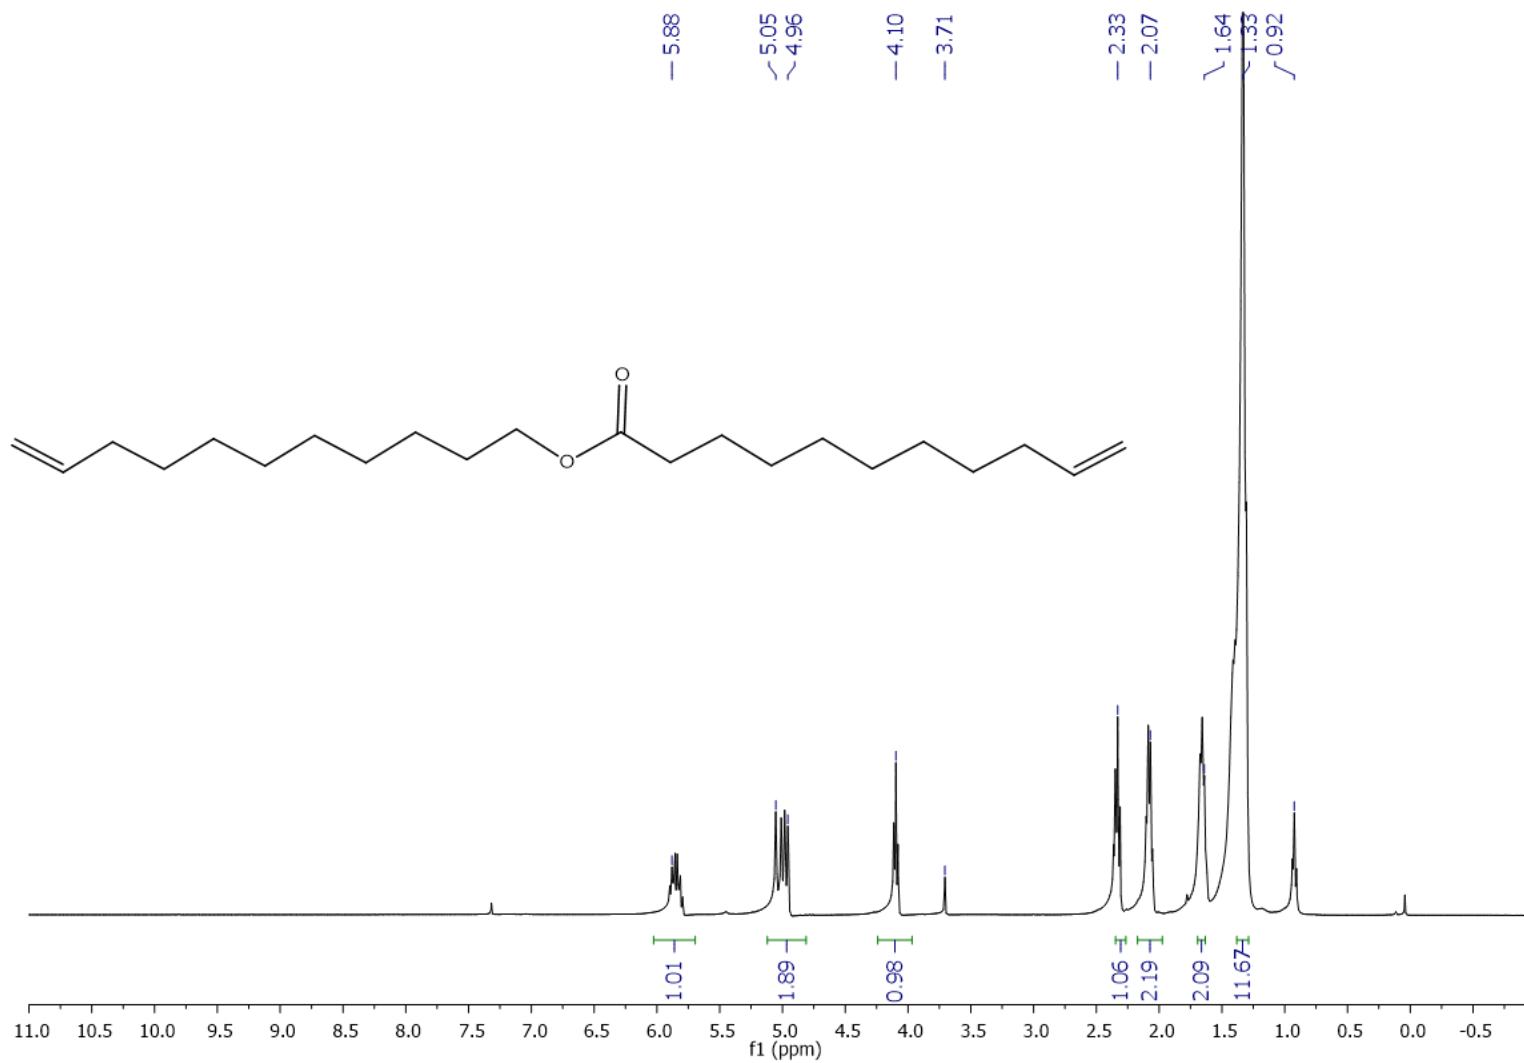

**Figure S13.** <sup>1</sup>H NMR spectrum of 10-undecen-1-yl-10-undecenoate (400 MHz, CDCl<sub>3</sub>)

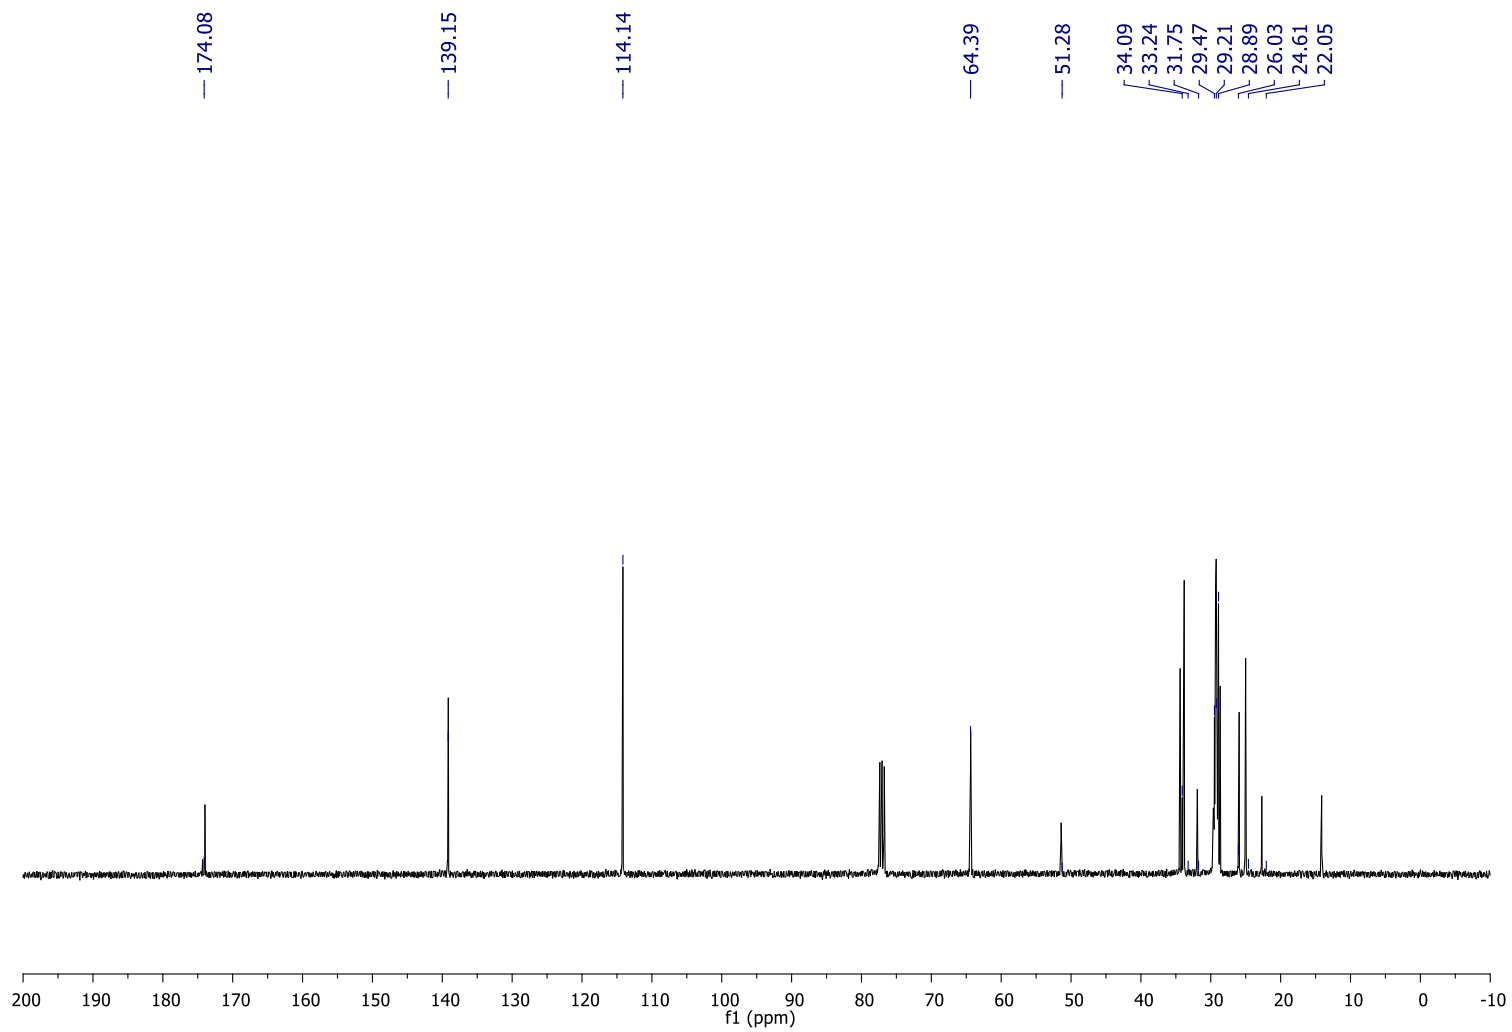

**Figure S14.**  $^{13}\text{C}$  NMR spectrum of 10-undecen-1-yl-10-undecenoate (100 MHz,  $\text{CDCl}_3$ )

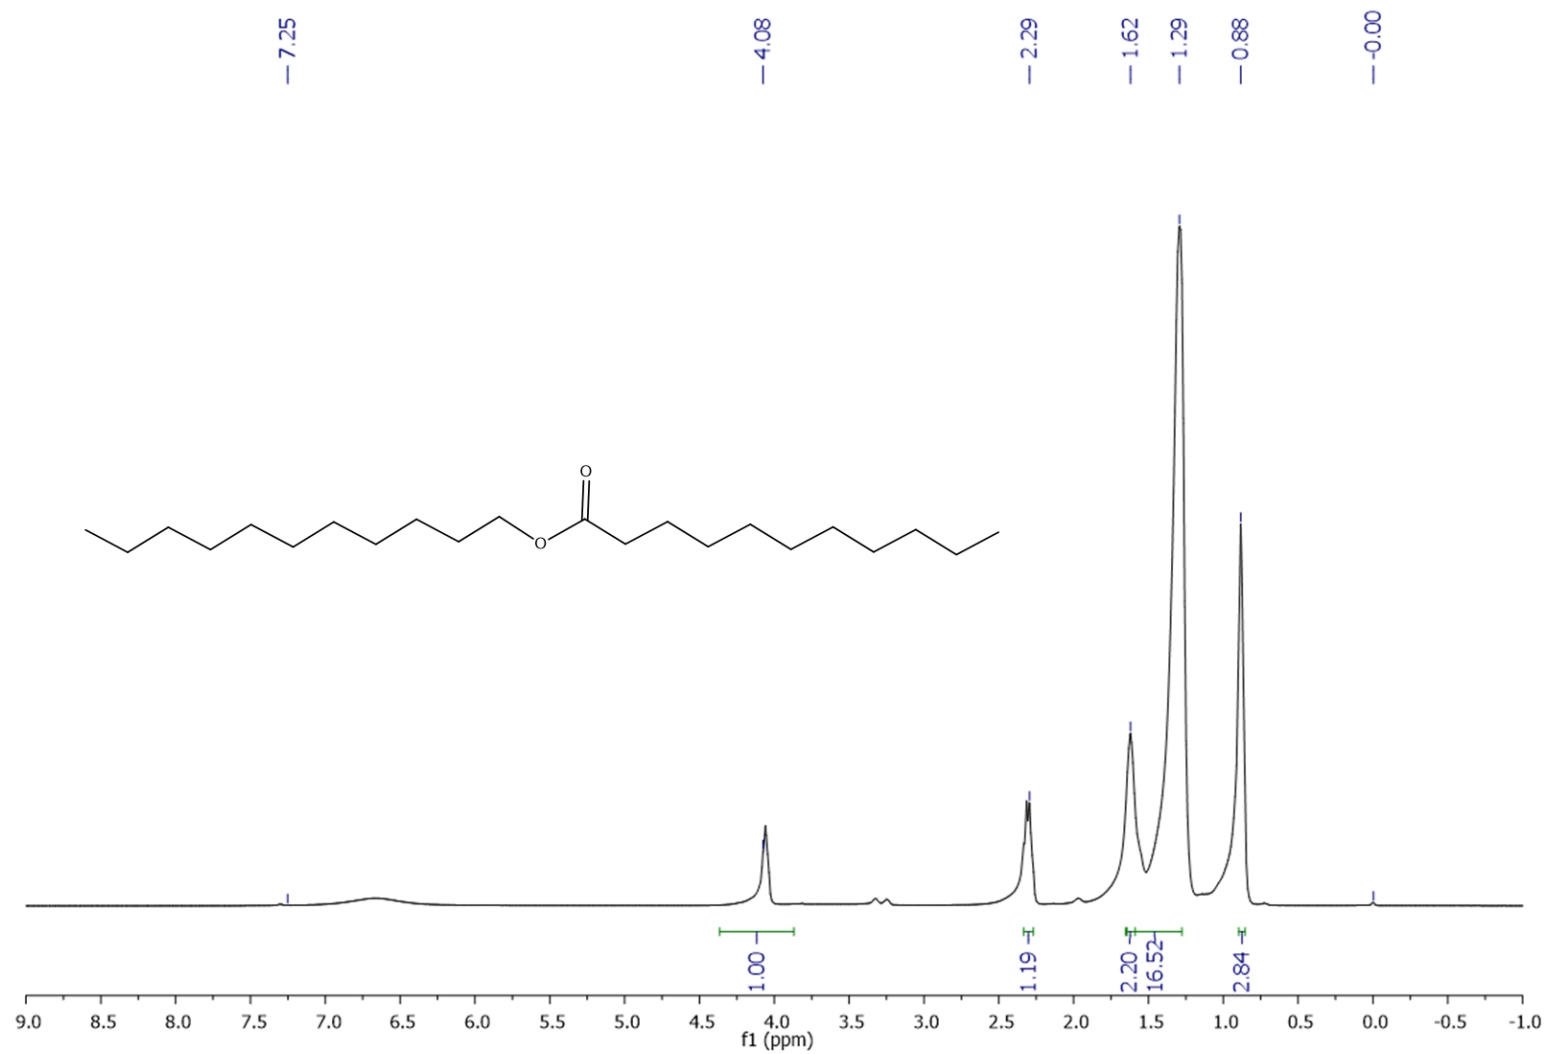

**Figure S15.** <sup>1</sup>H NMR spectrum of undecyl undecanoate (400 MHz, CDCl<sub>3</sub>)

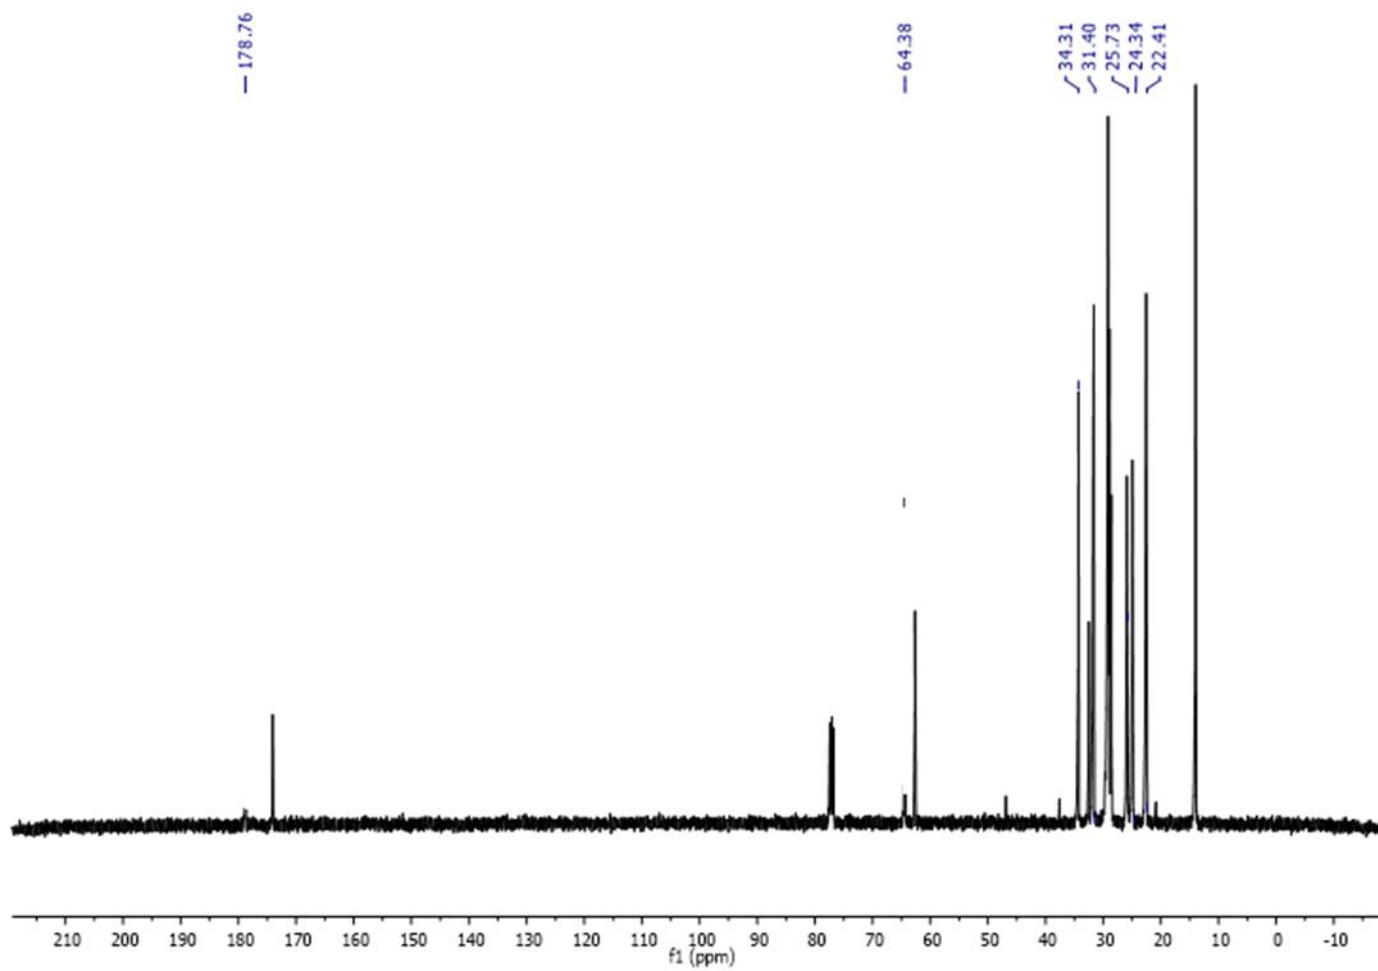

**Figure S16.**  $^{13}\text{C}$  NMR spectrum of undecyl undecanoate (100 MHz,  $\text{CDCl}_3$ )

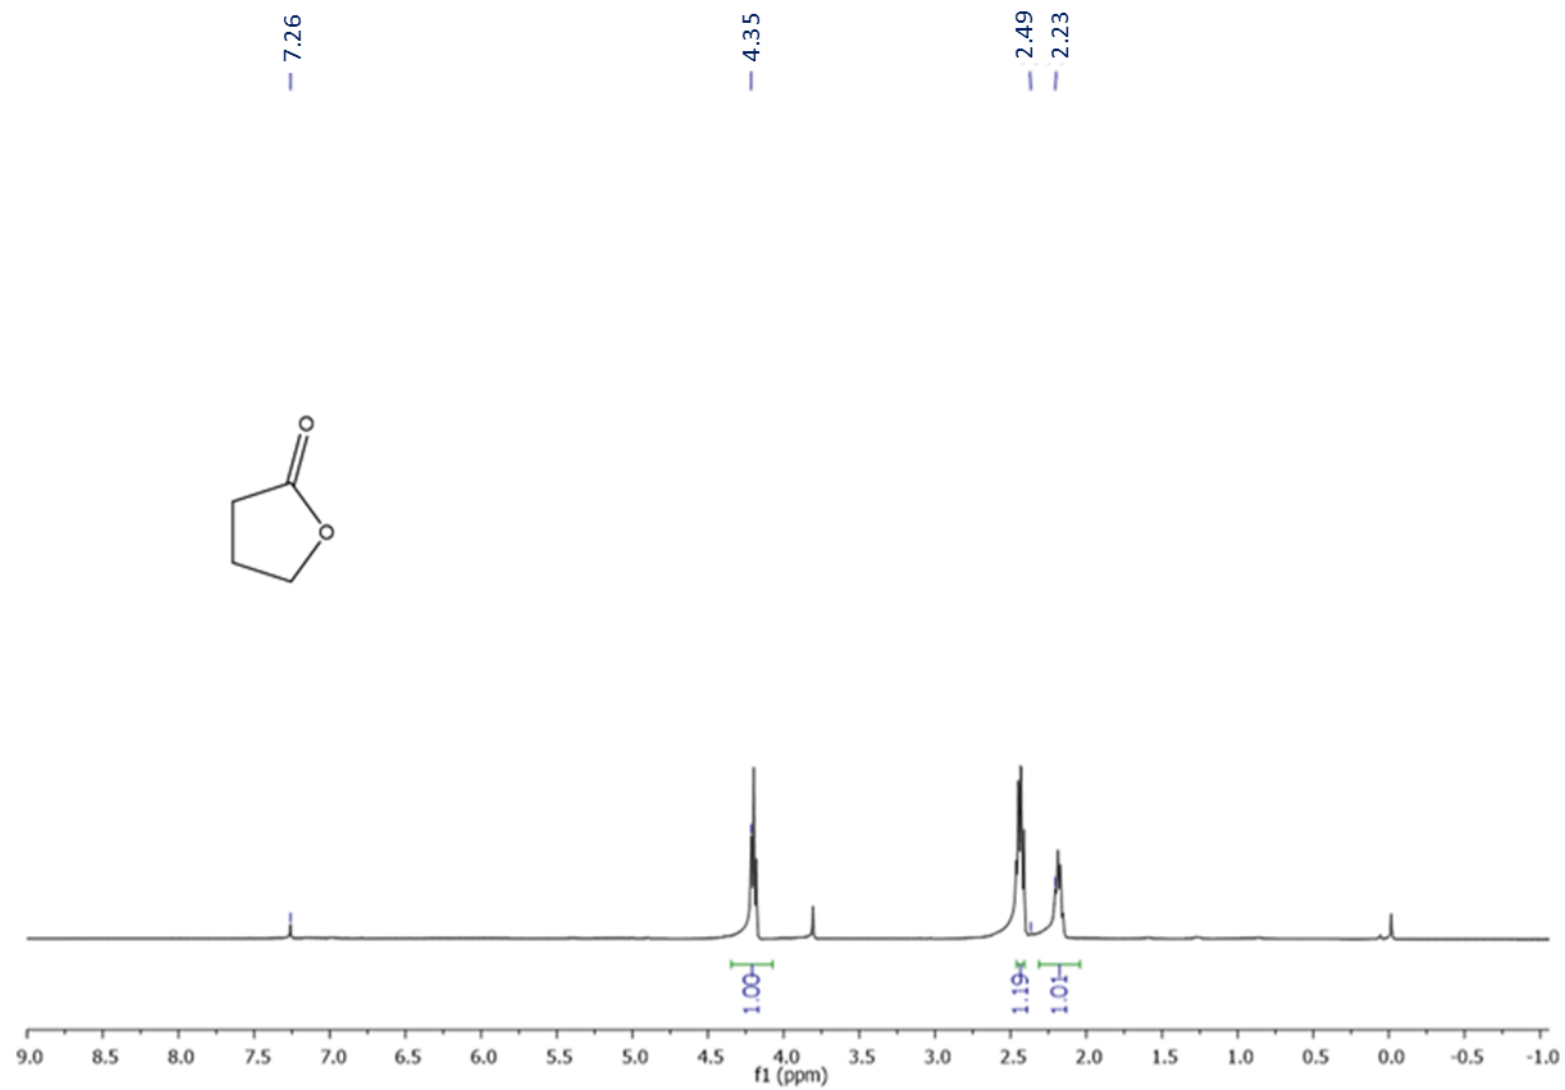

**Figure S17.**  $^1\text{H}$  NMR spectrum of  $\gamma$ -butyrolactone (400 MHz,  $\text{CDCl}_3$ )

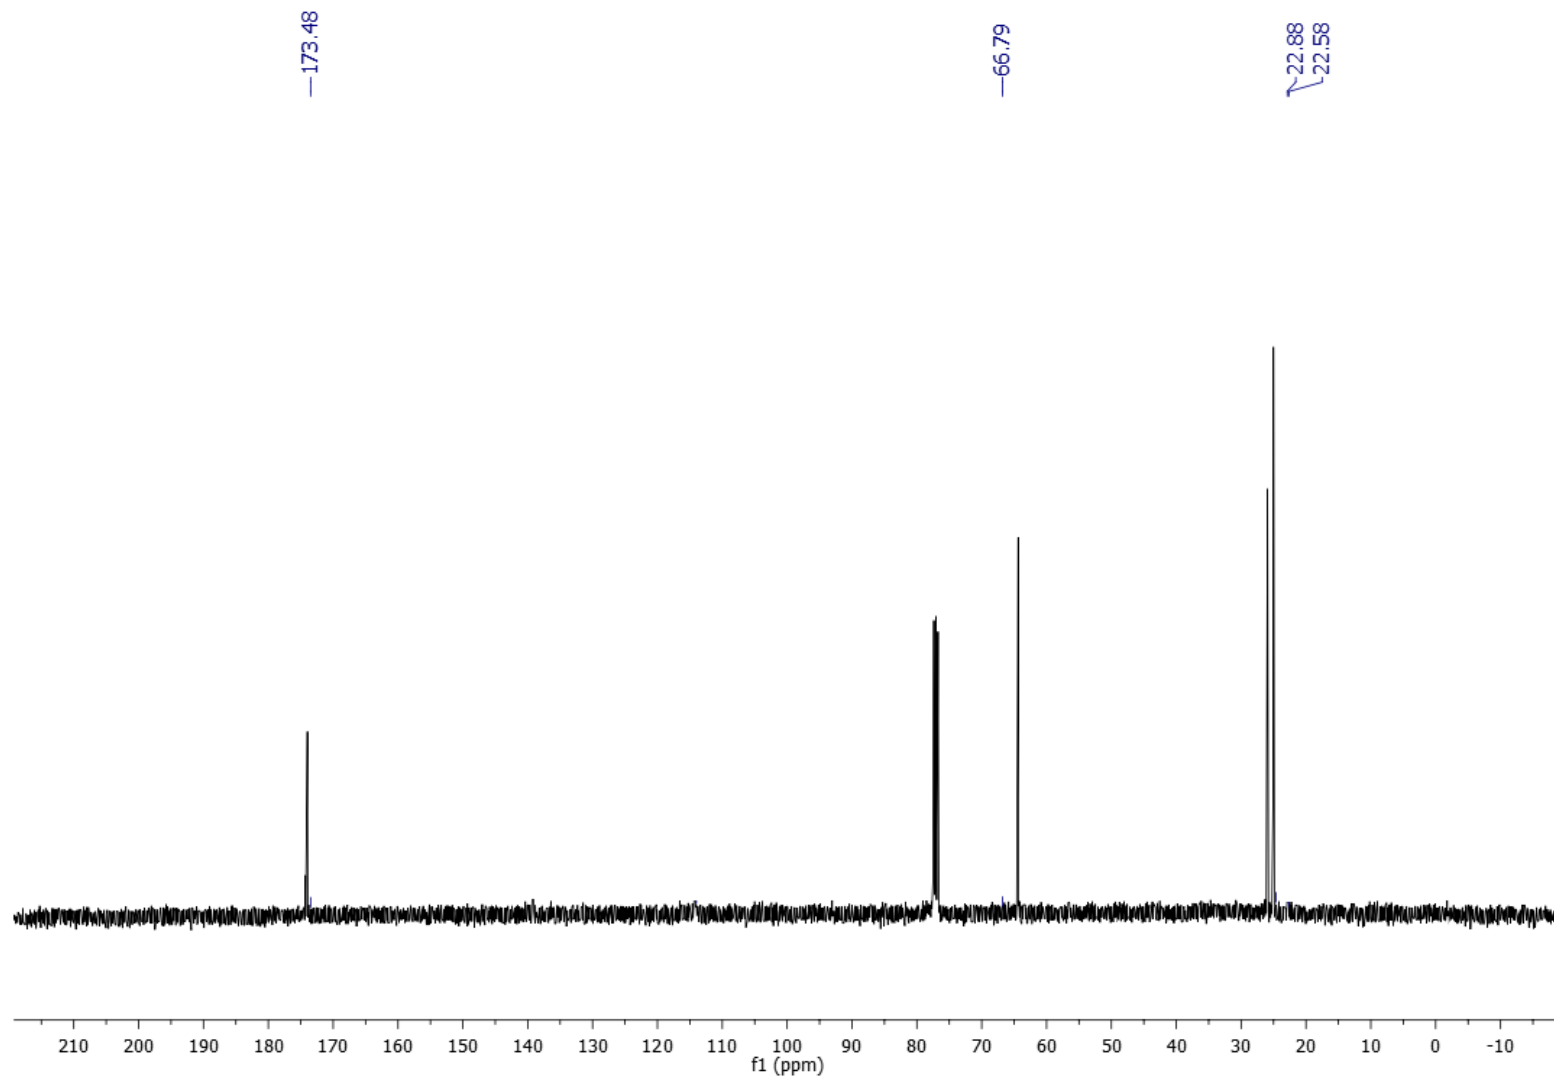

**Figure S18.**  $^{13}\text{C}$  NMR spectrum of  $\gamma$ -butyrolactone (100 MHz,  $\text{CDCl}_3$ )
